# Supplementary material for: Real-world practice of conversion surgery for unresectable hepatocellular carcinoma - a single center data of 26 consecutive patients
Source: PubMed Central journal article supplement (PMC10199571; doi:10.1186/s12885-023-10955-7), 2023-05-20
Supplement: 12885_2023_10955_MOESM1_ESM.pdf [file 12885_2023_10955_MOESM1_ESM.pdf]

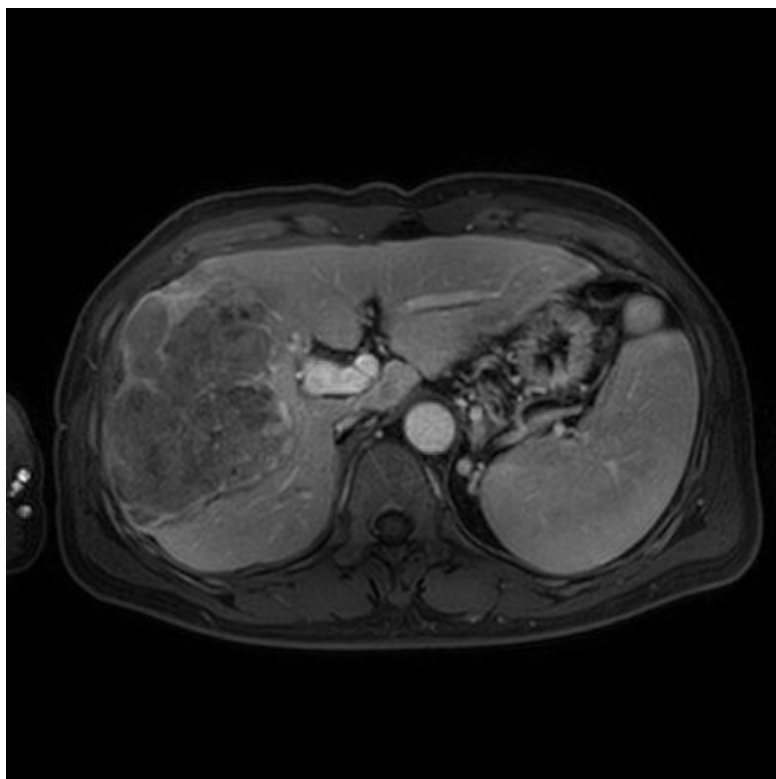

Before conversion

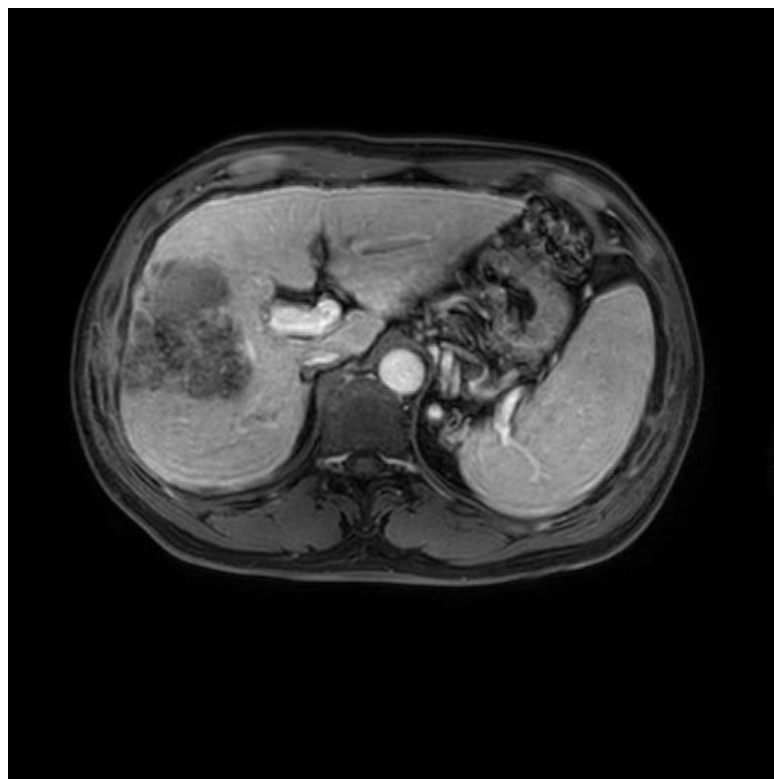

After conversion

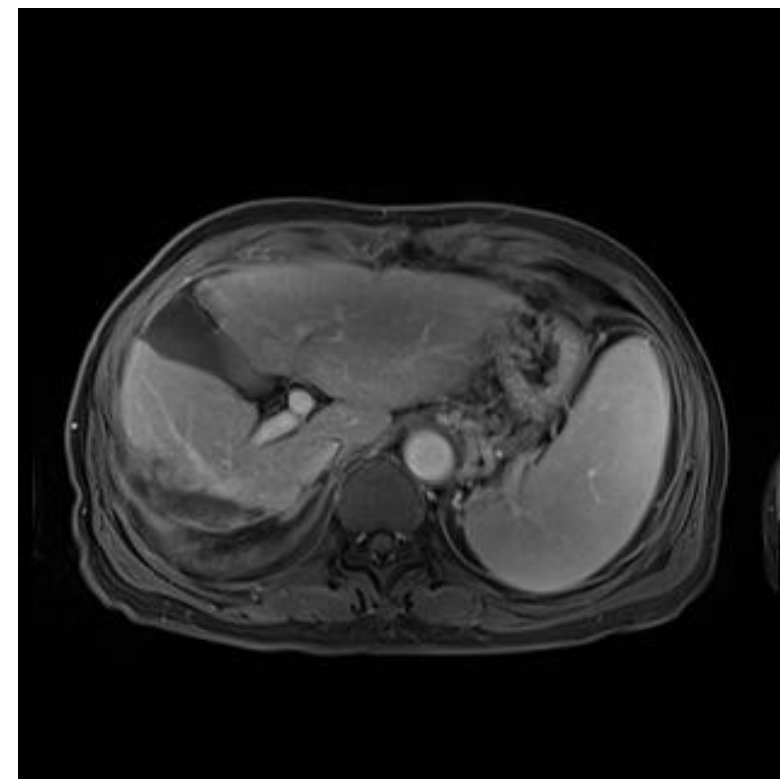

After surgery

**Patient 01**

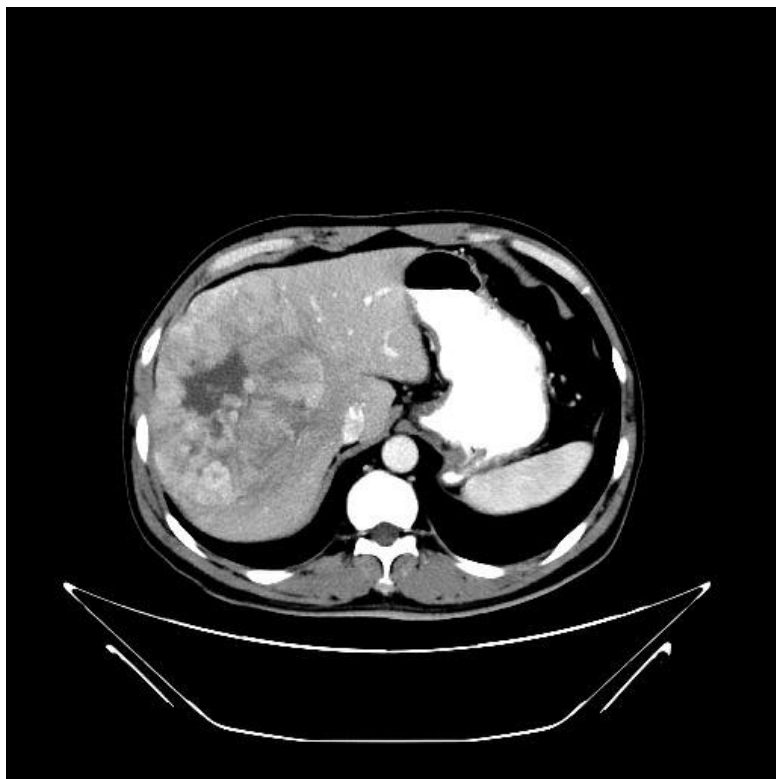

Before conversion

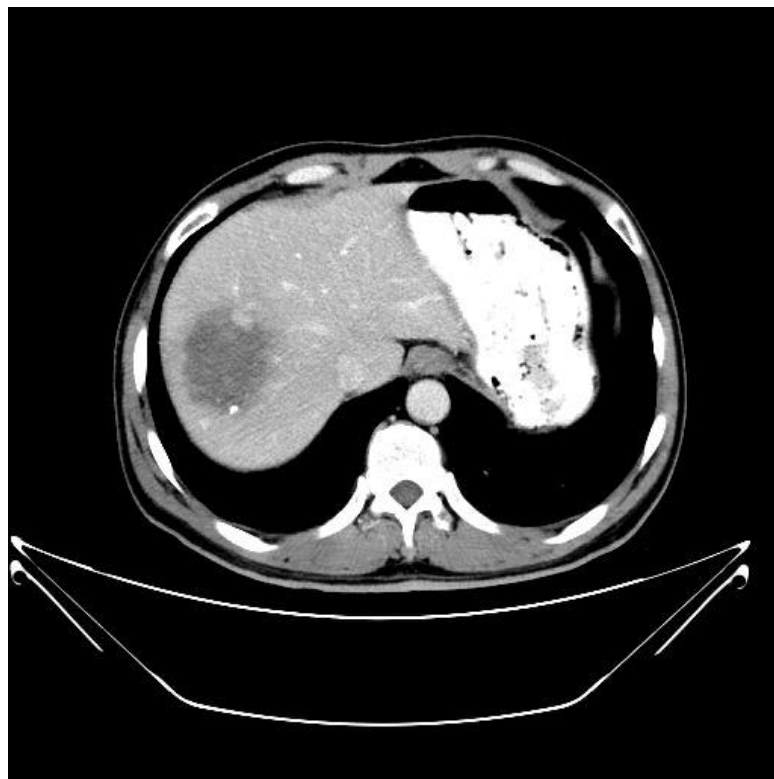

After conversion

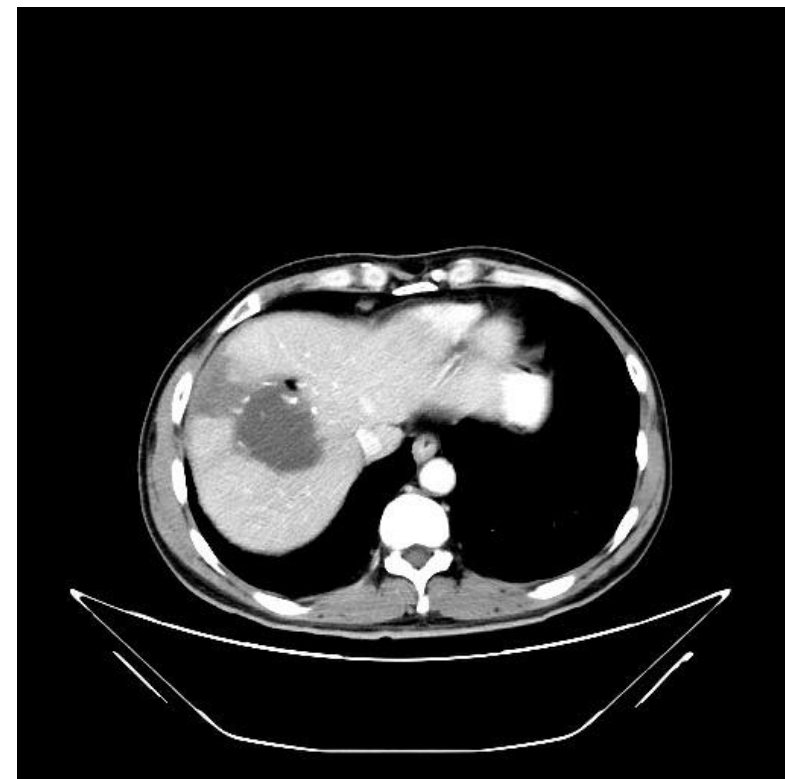

After surgery

**Patient 02**

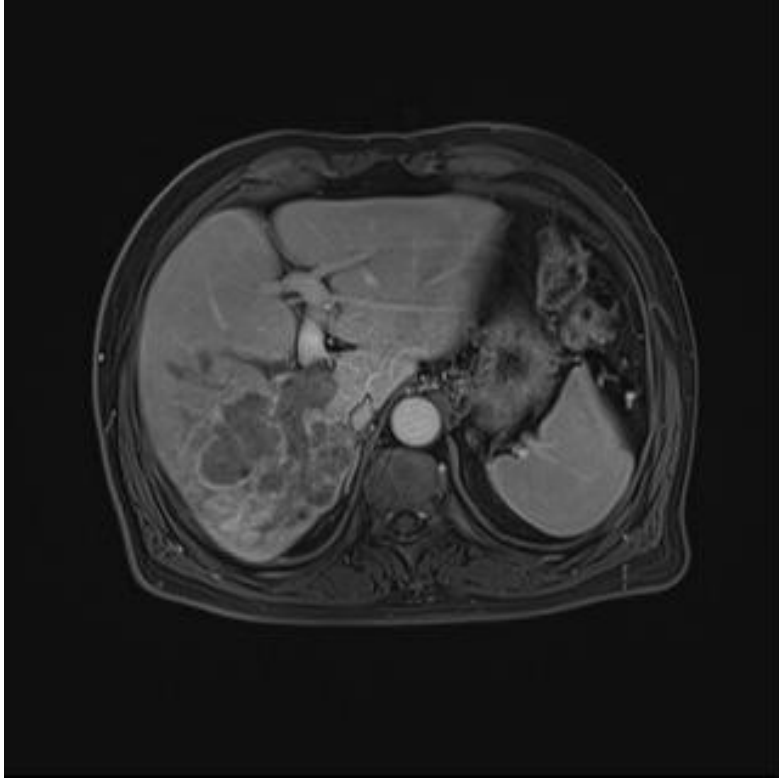

Before conversion

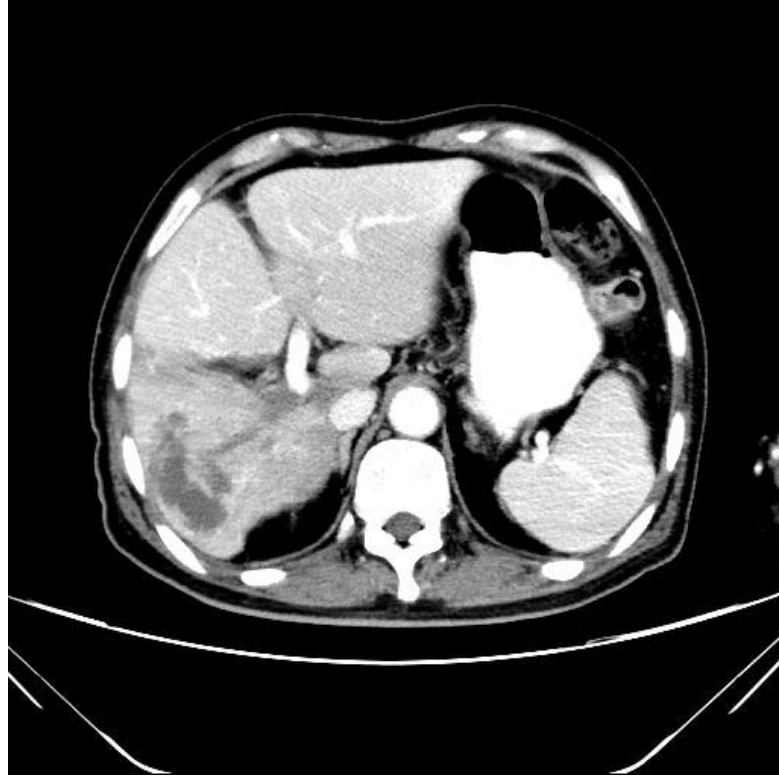

After conversion

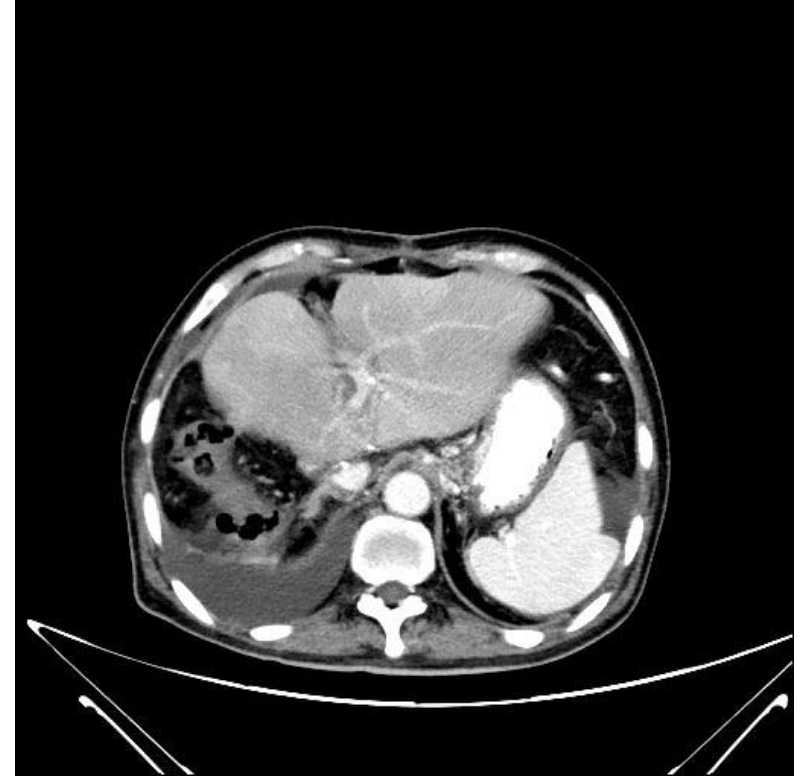

After surgery

**Patient 03**

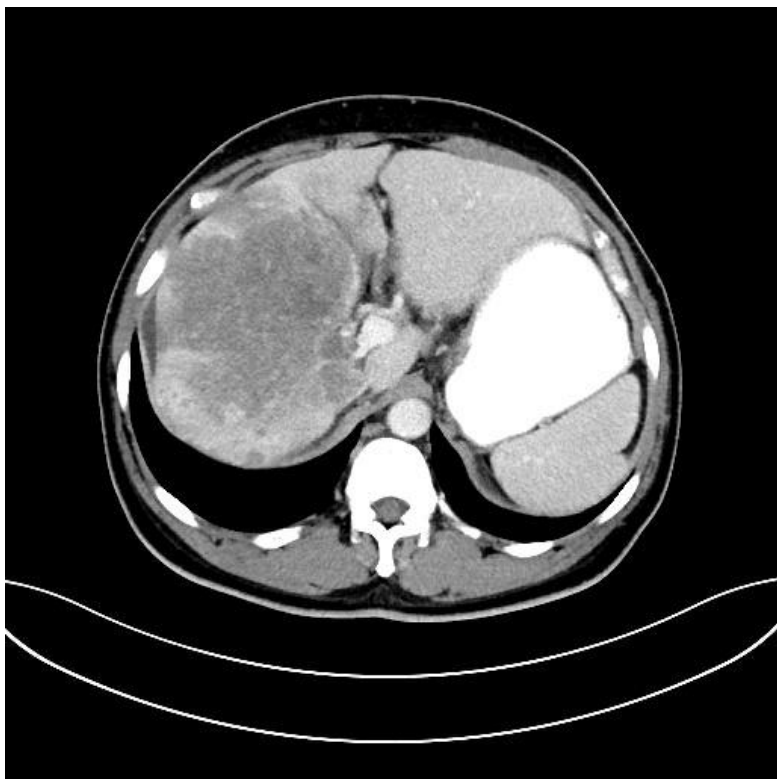

Before conversion

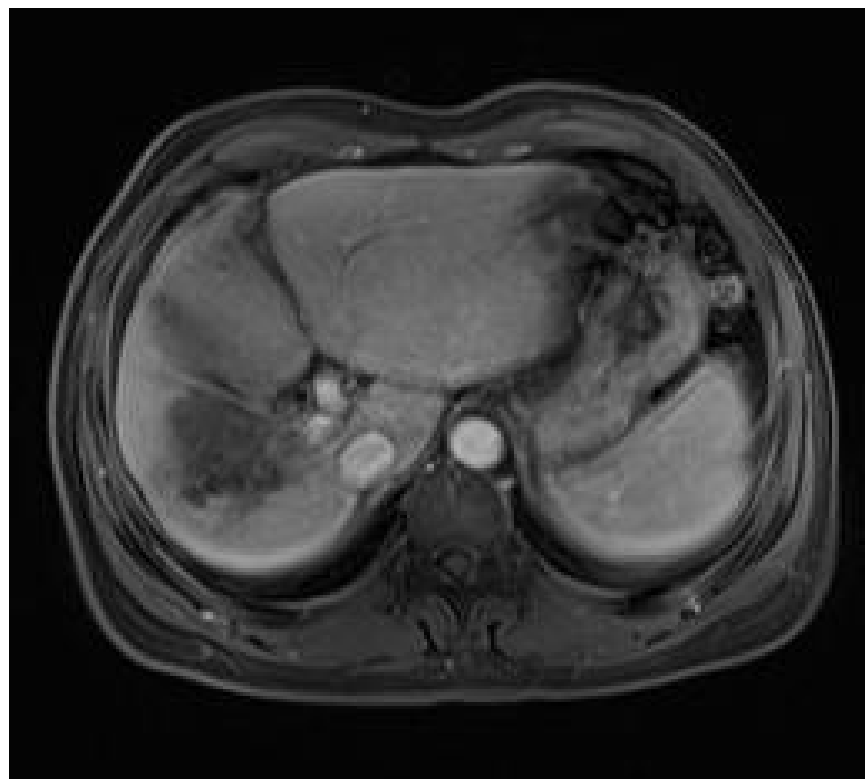

After conversion

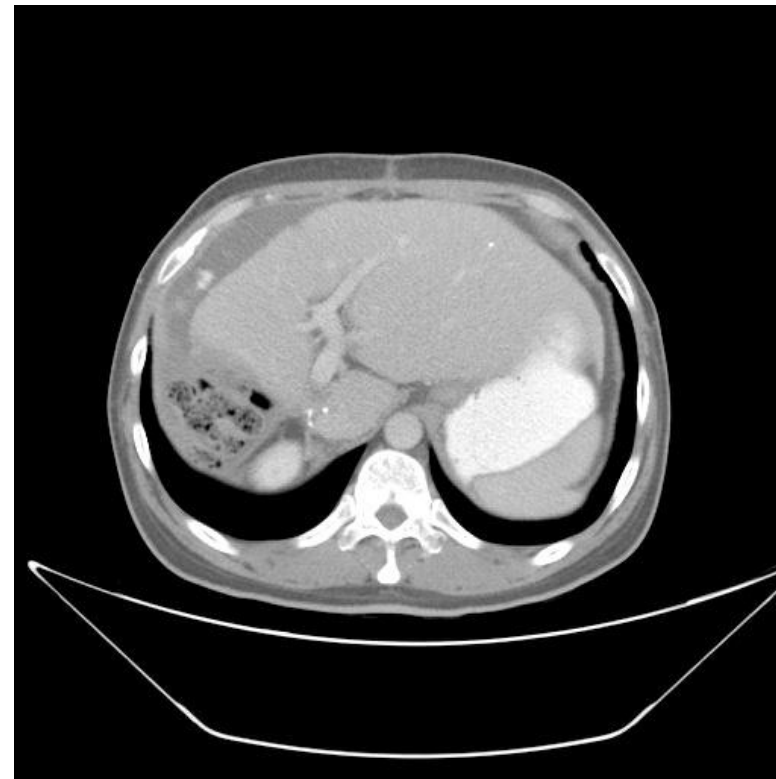

After surgery

**Patient 04**

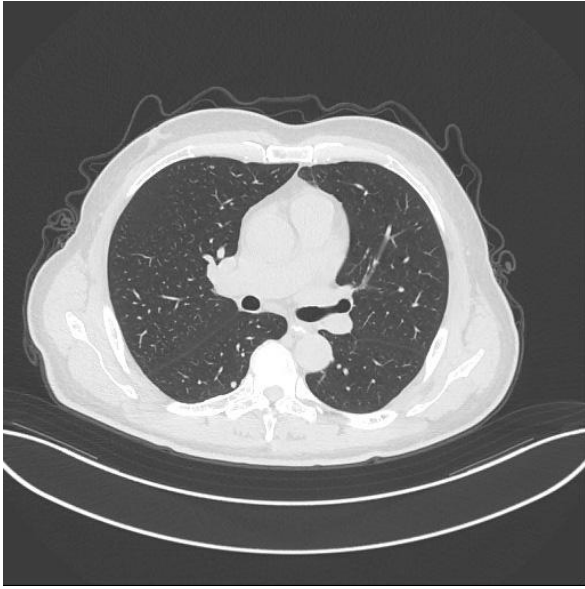

Before conversion

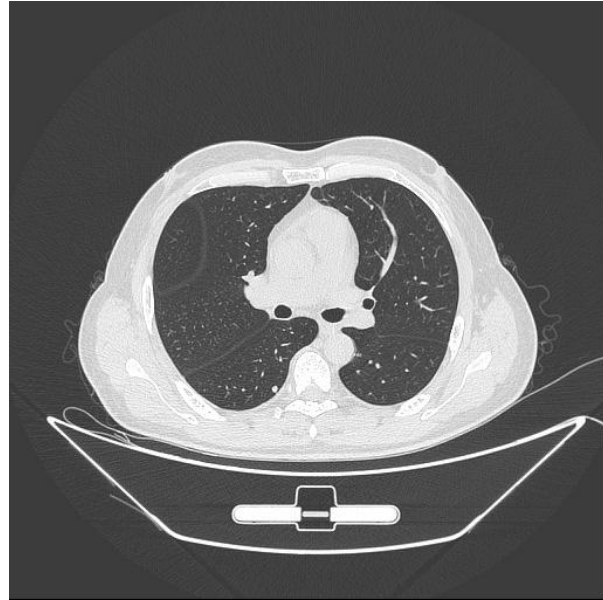

After conversion

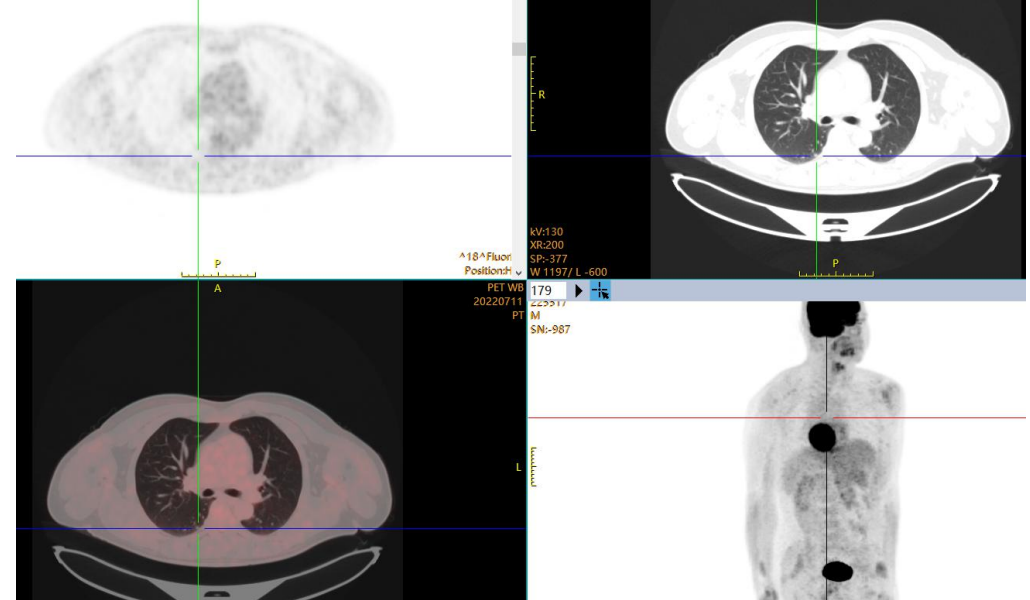

After surgery

**Patient 04**

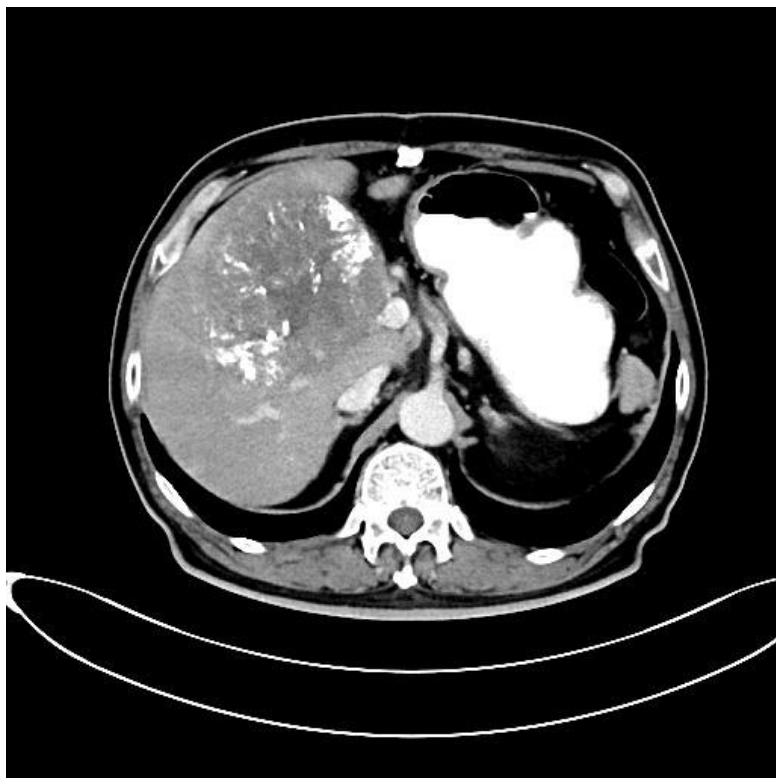

Before conversion

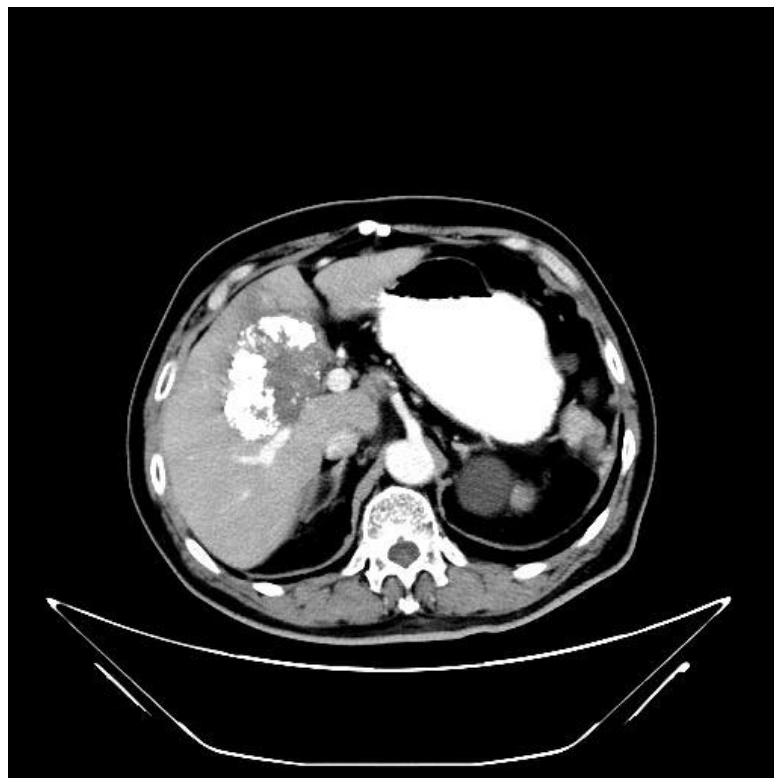

After conversion

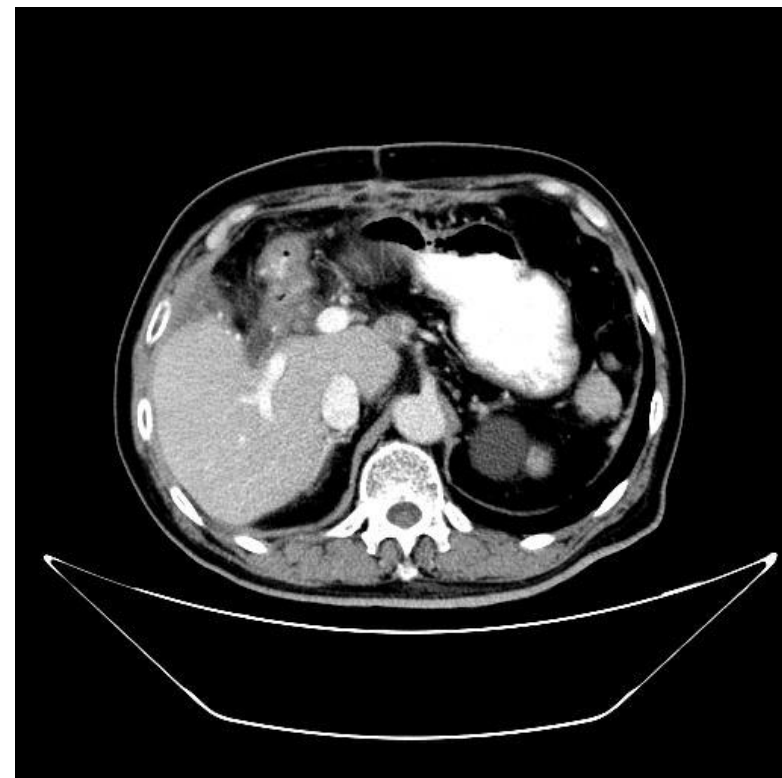

After surgery

**Patient 05**

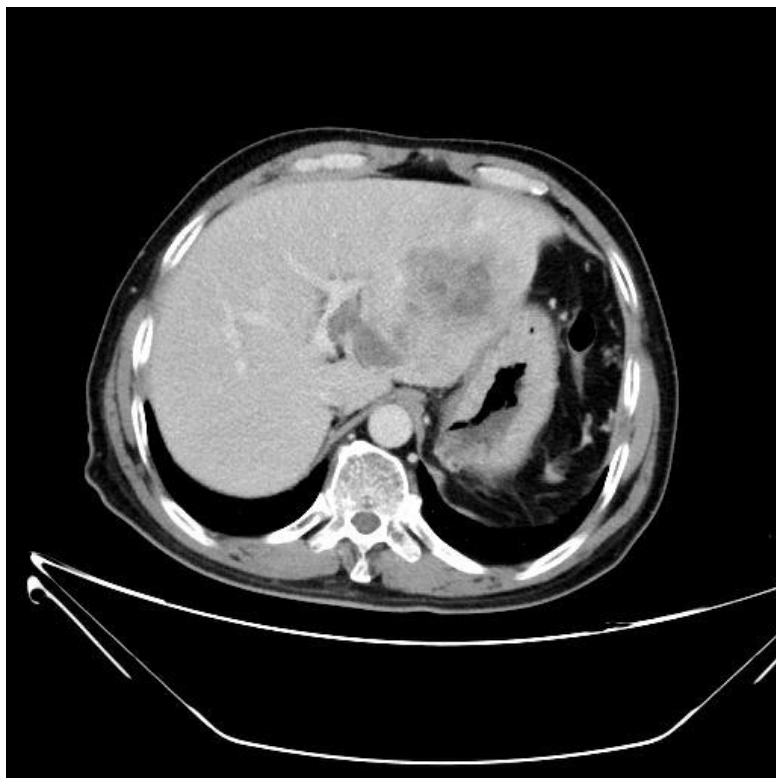

Before conversion

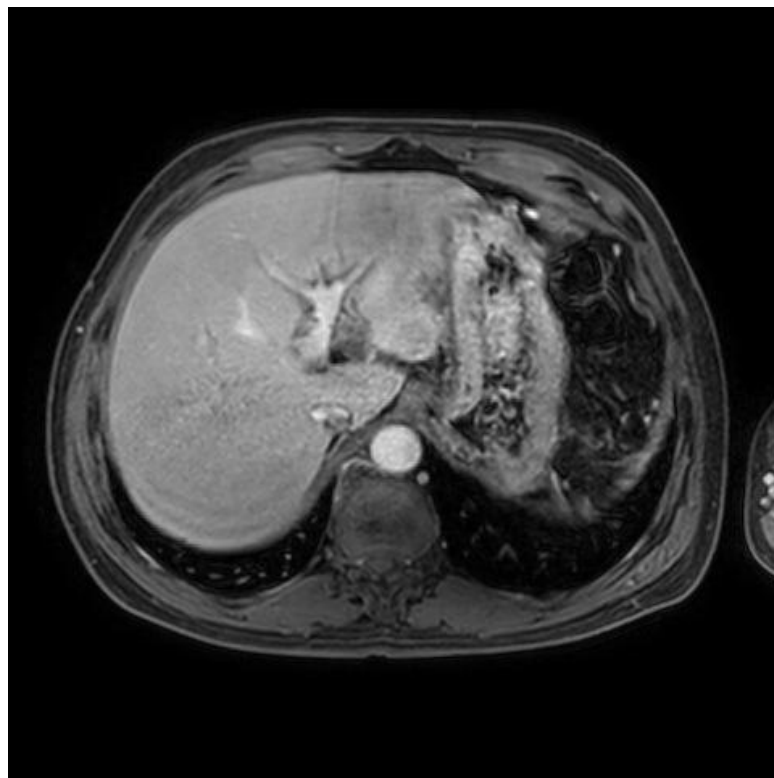

After conversion

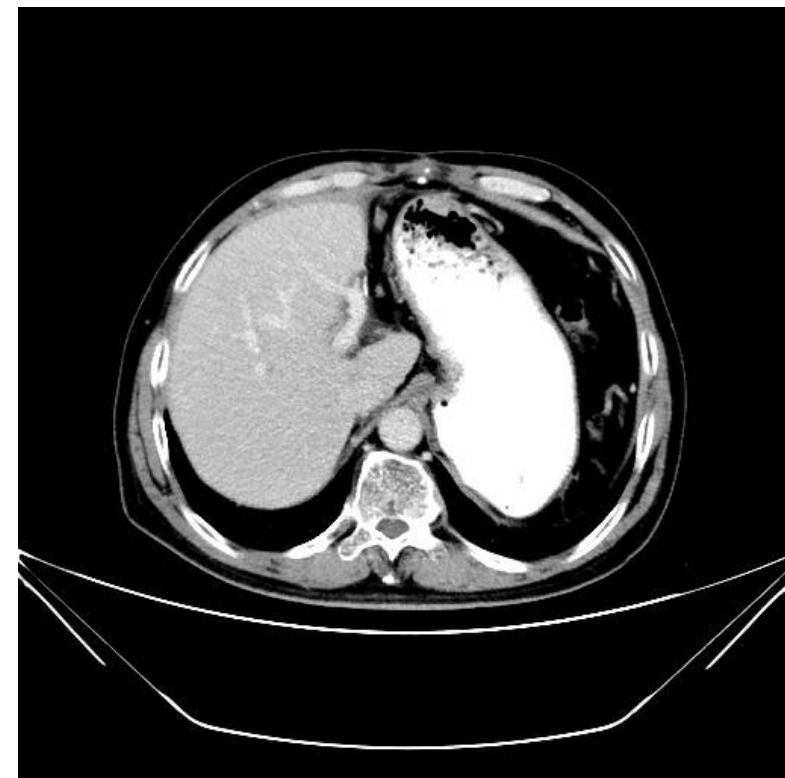

After surgery

**Patient 06**

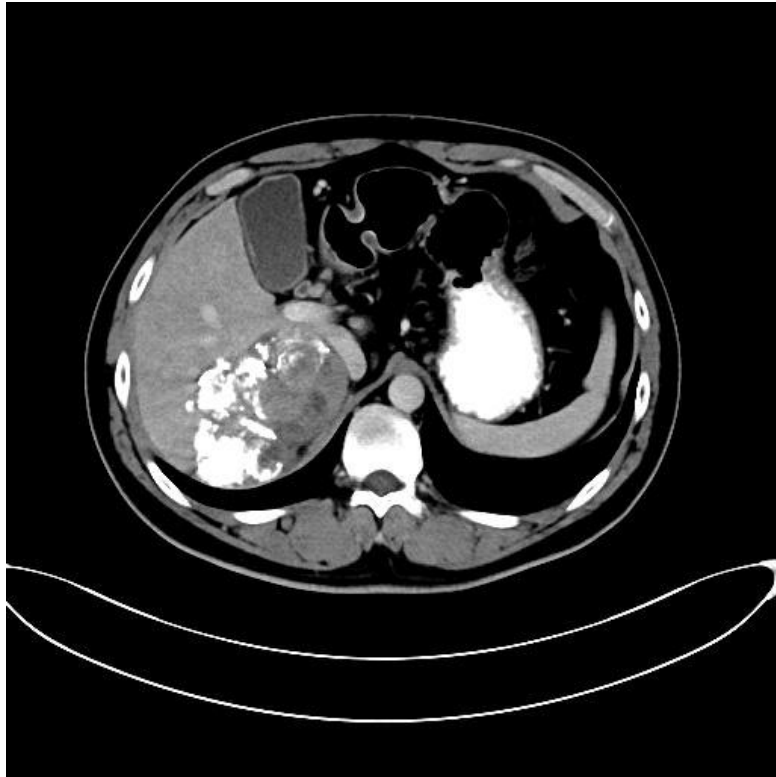

Before conversion

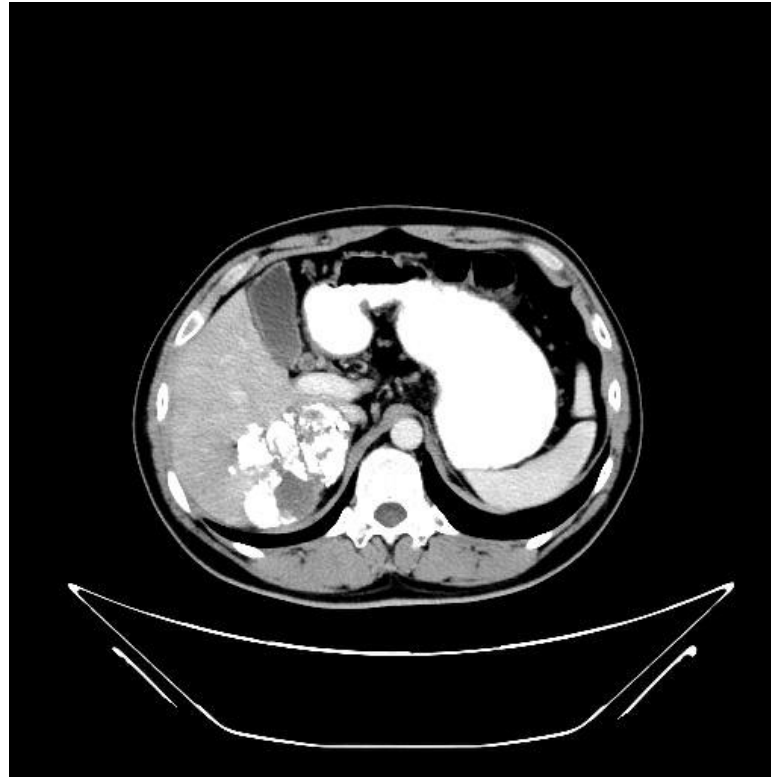

After conversion

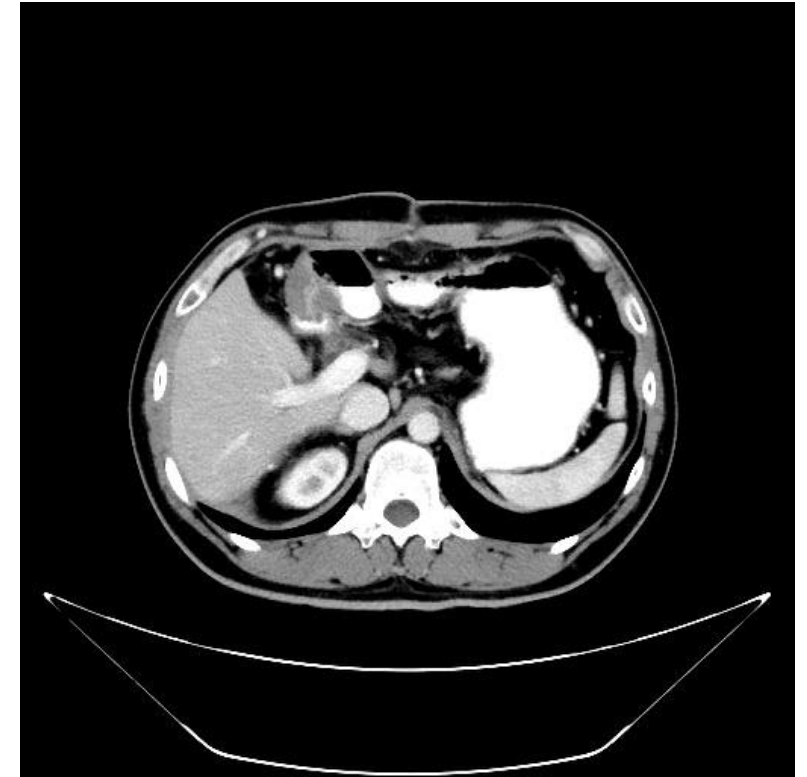

After surgery

**Patient 07**



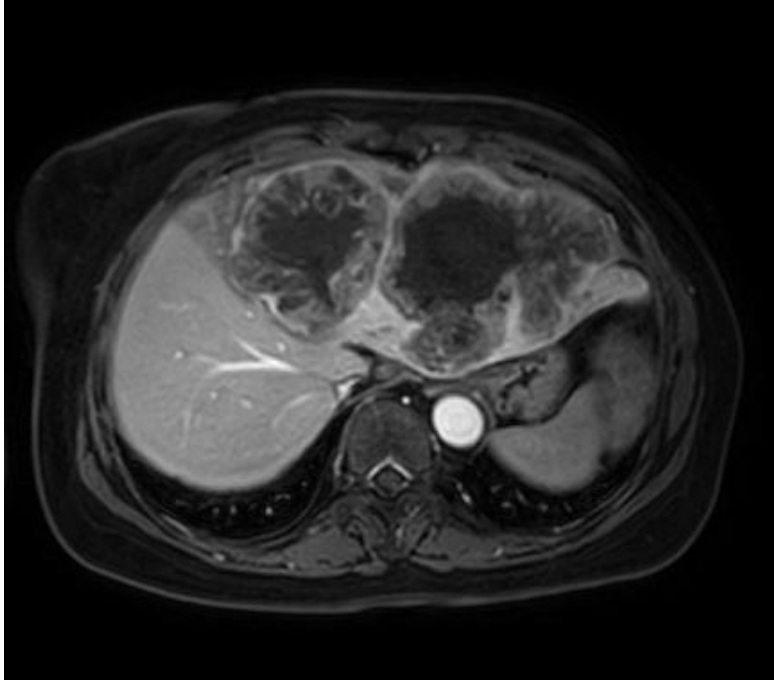

Before conversion

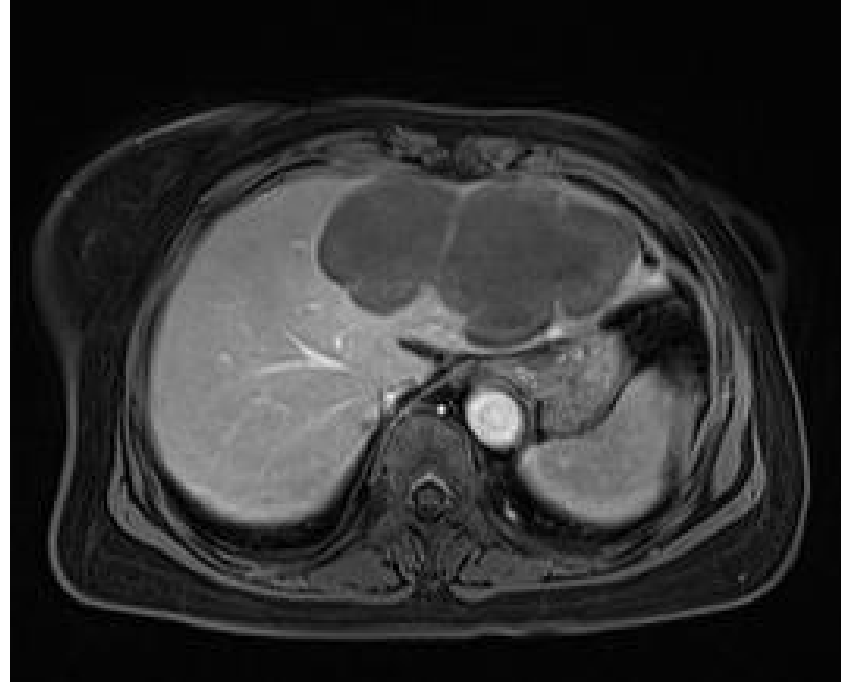

After conversion

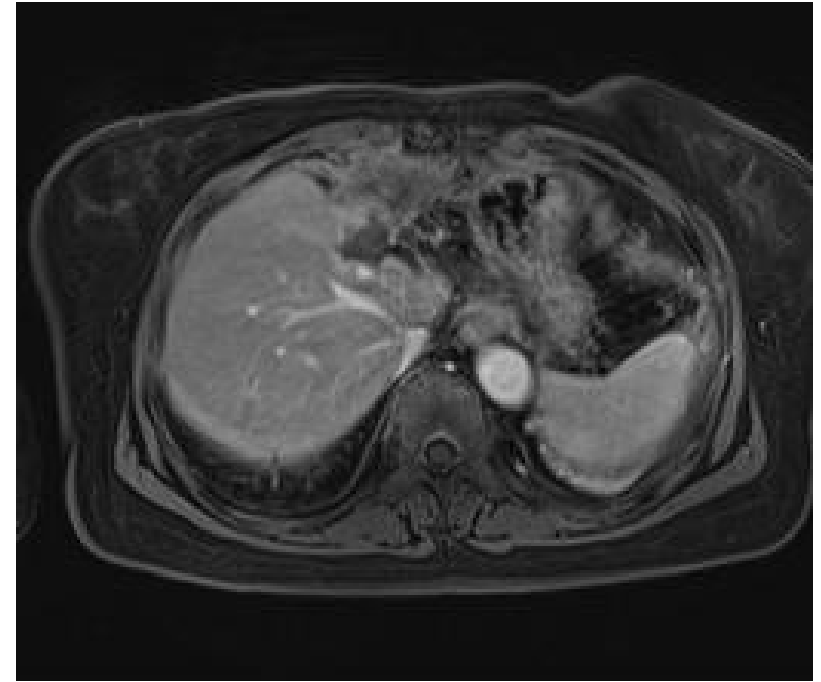

After surgery

**Patient 08**

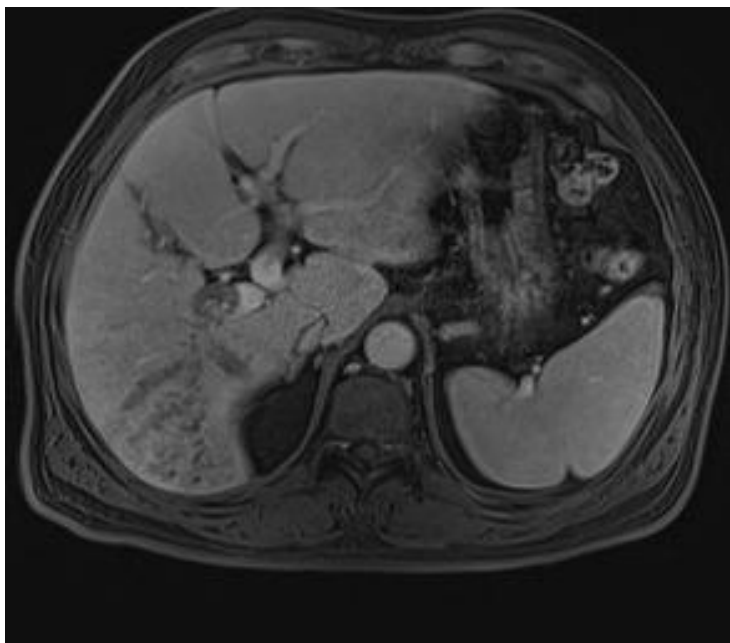

Before conversion

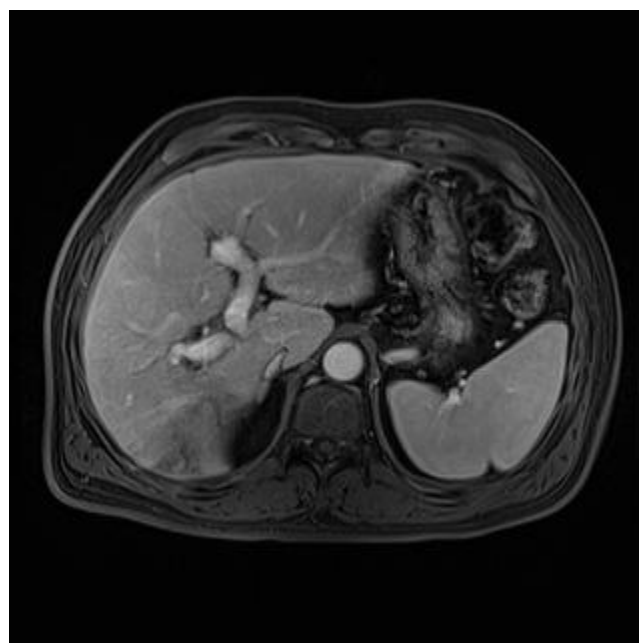

After conversion

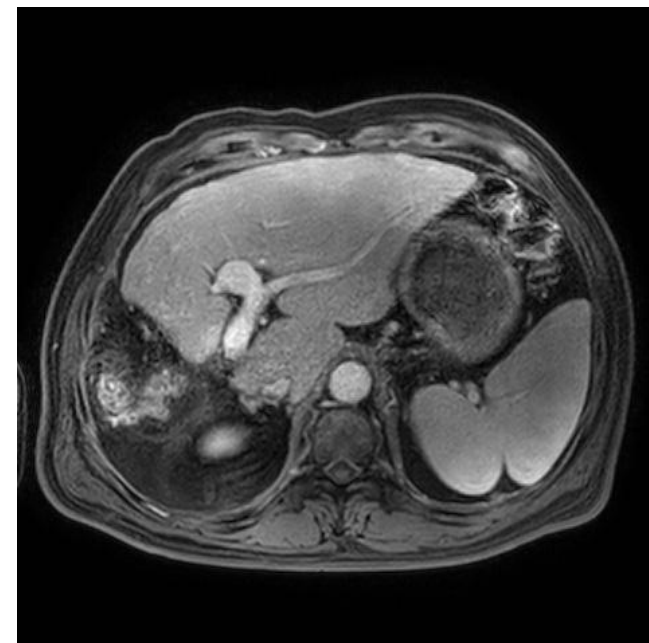

After surgery

**Patient 09**

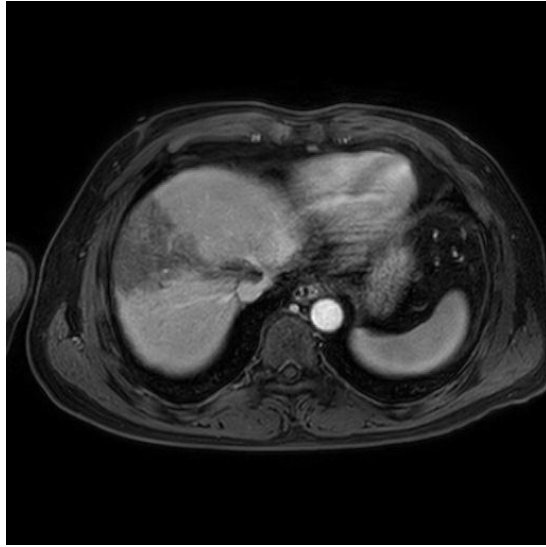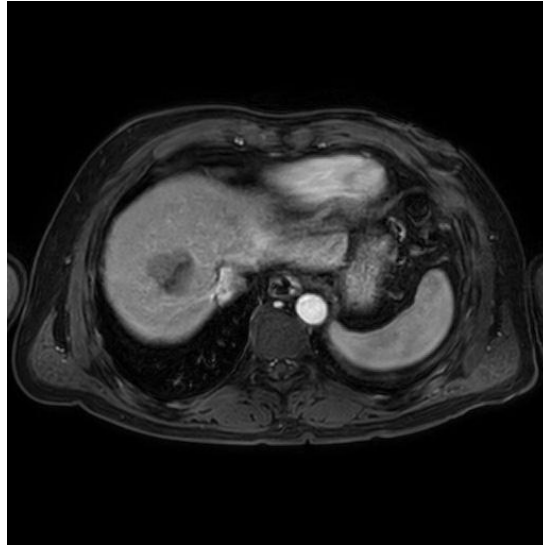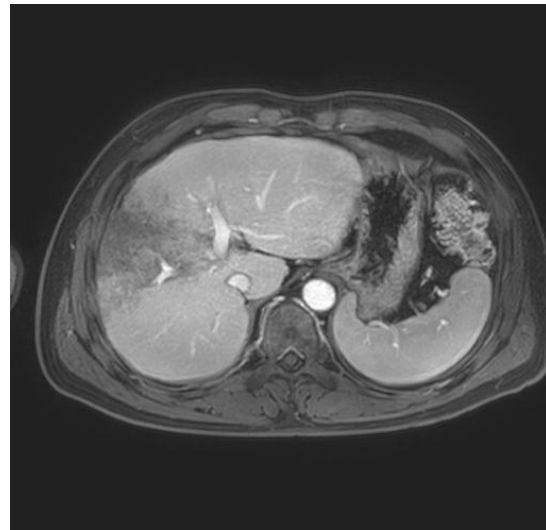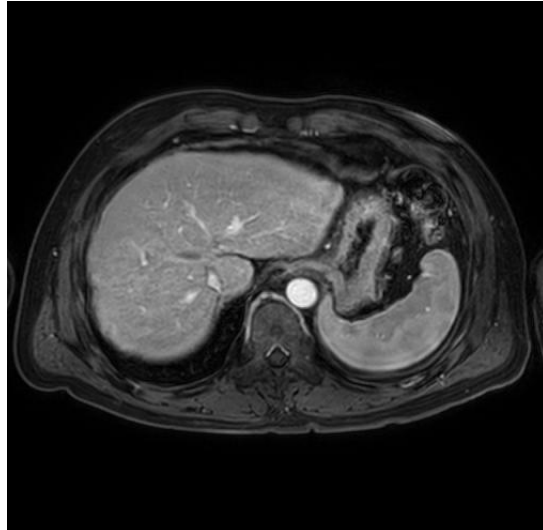

Before conversion

After conversion

**Patient 10**

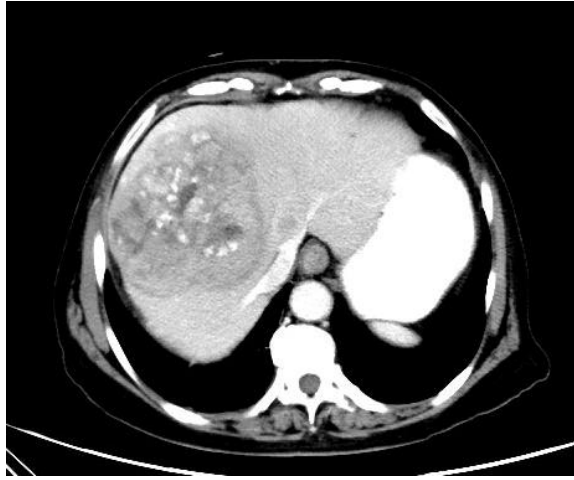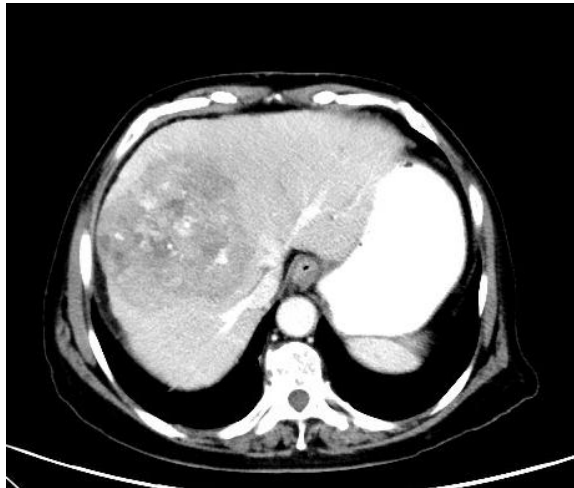

Before conversion

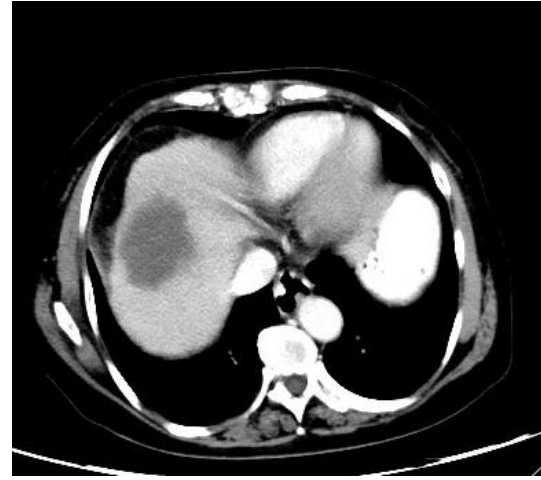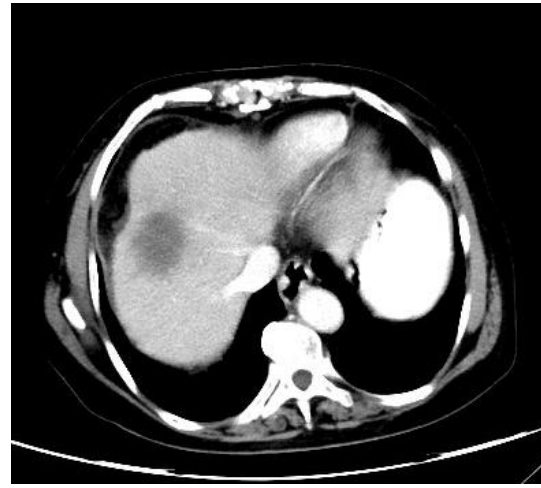

After conversion

**Patient 11**

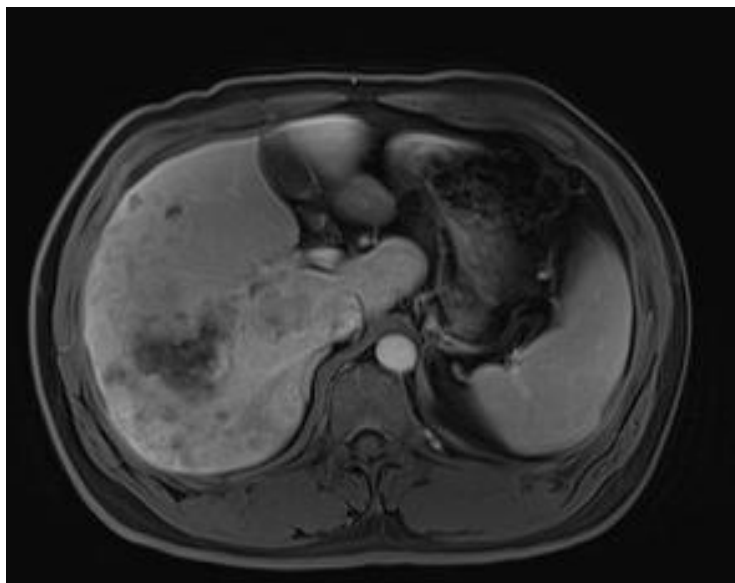

Before conversion

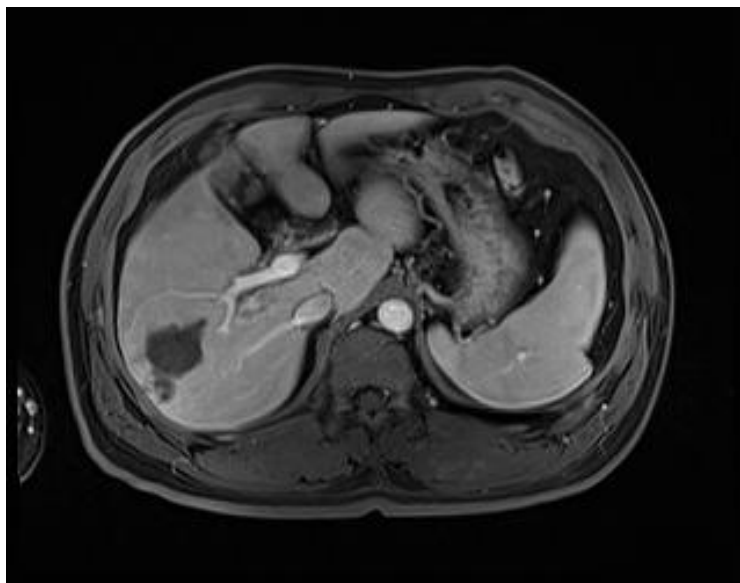

After conversion

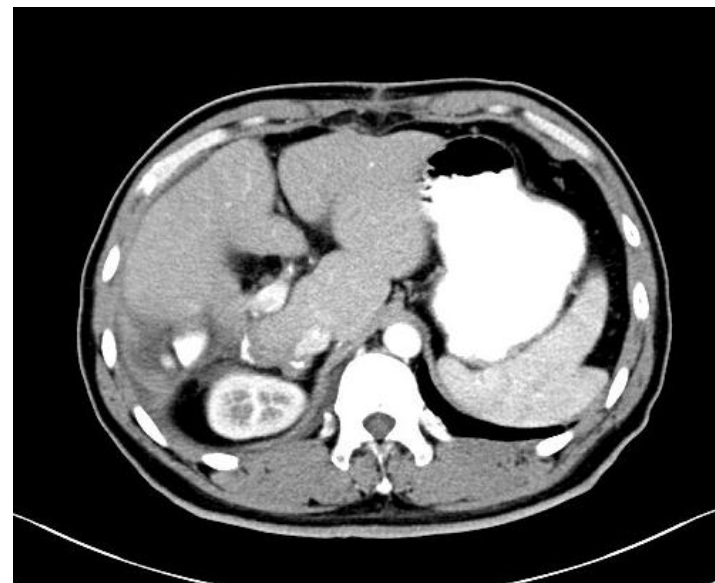

After surgery

**Patient 12**

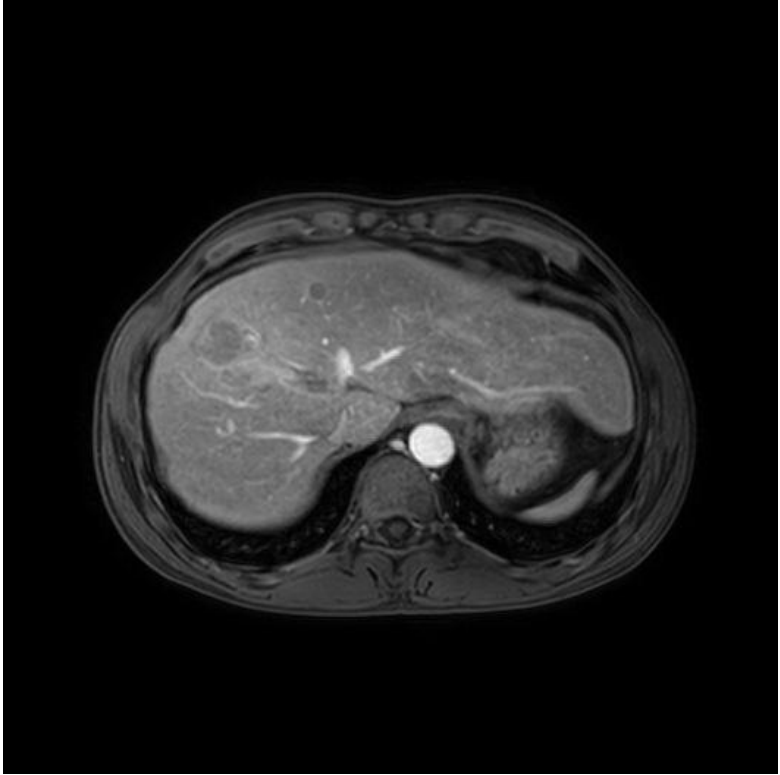

Before conversion

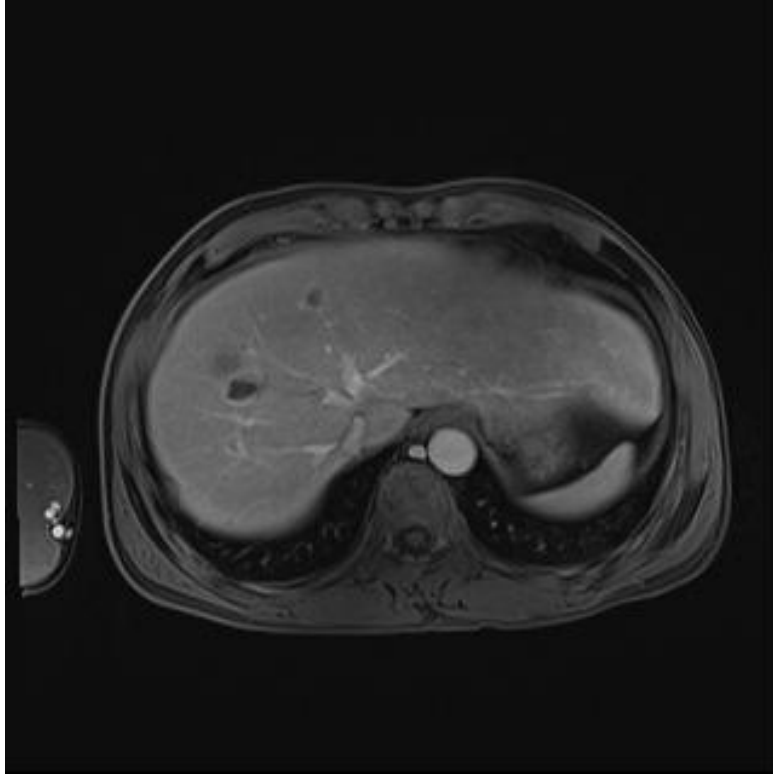

After conversion

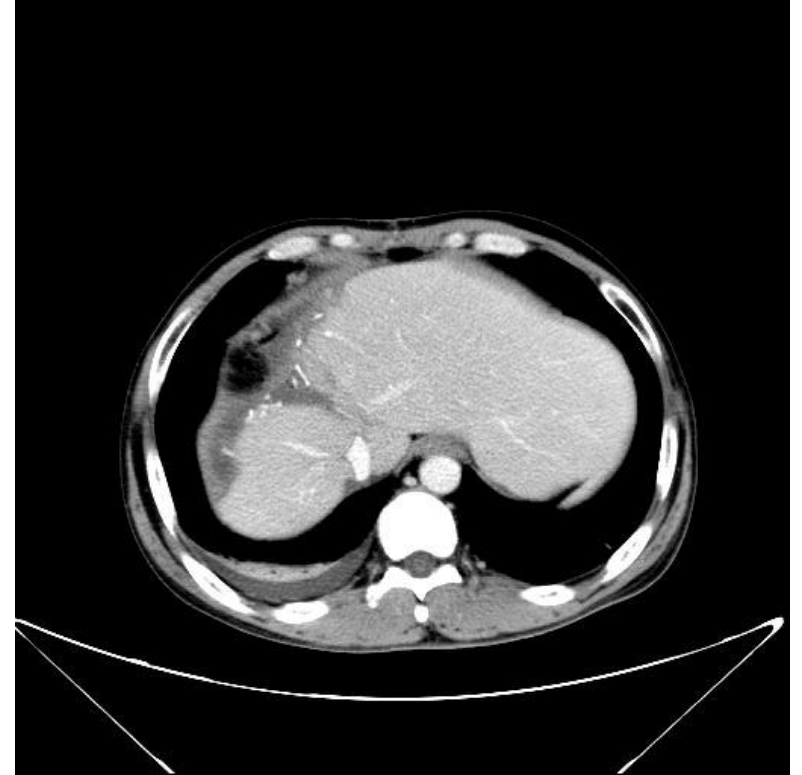

After surgery

**Patient 13**

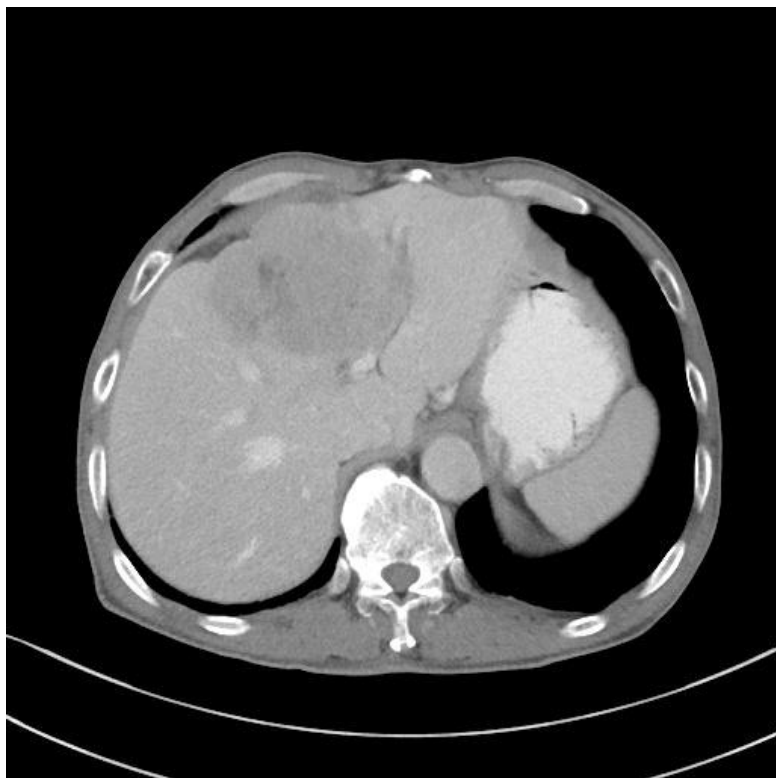

Before conversion

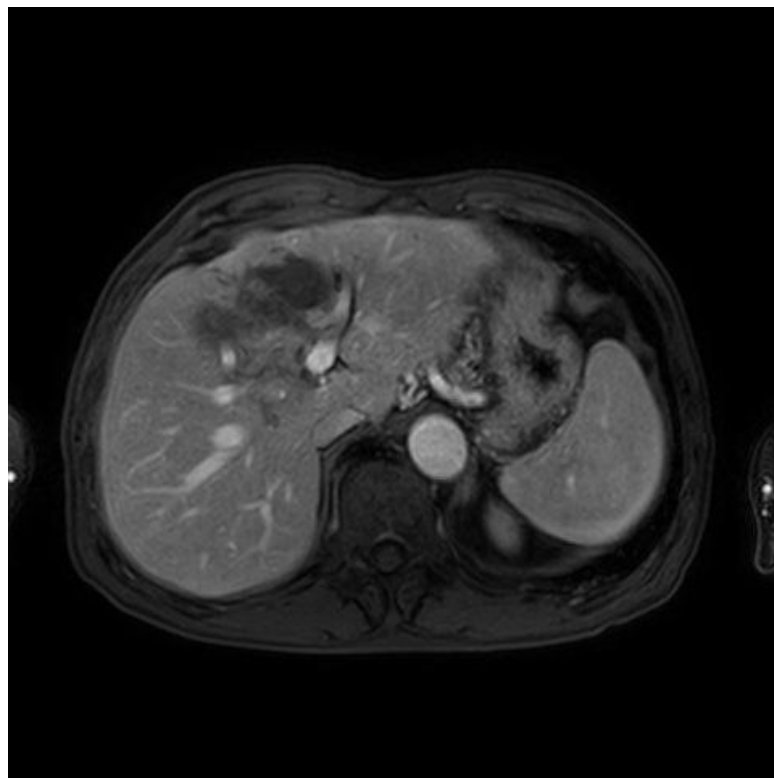

After conversion

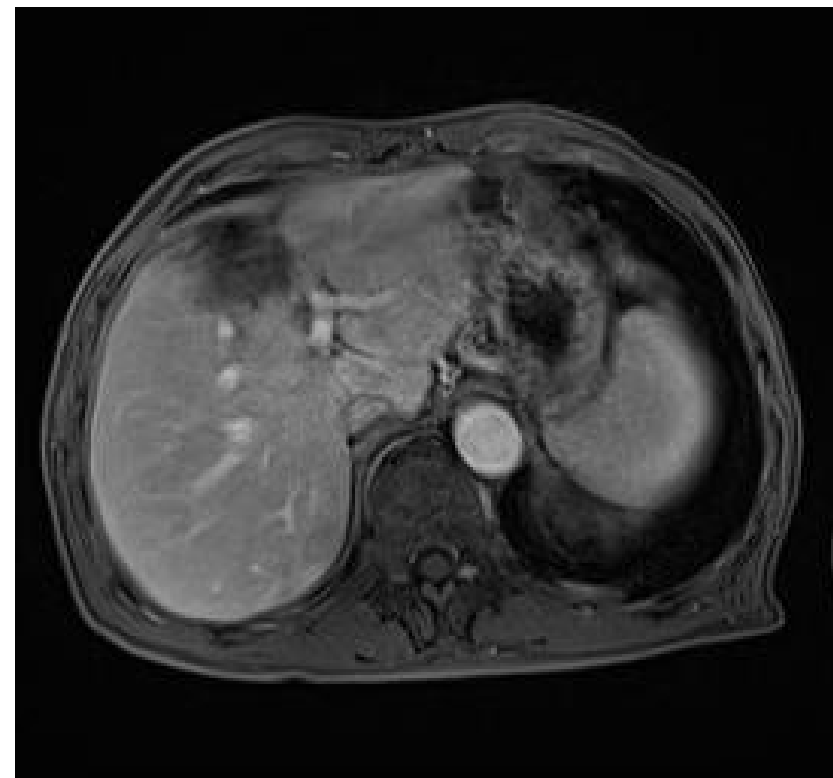

After surgery

**Patient 14**

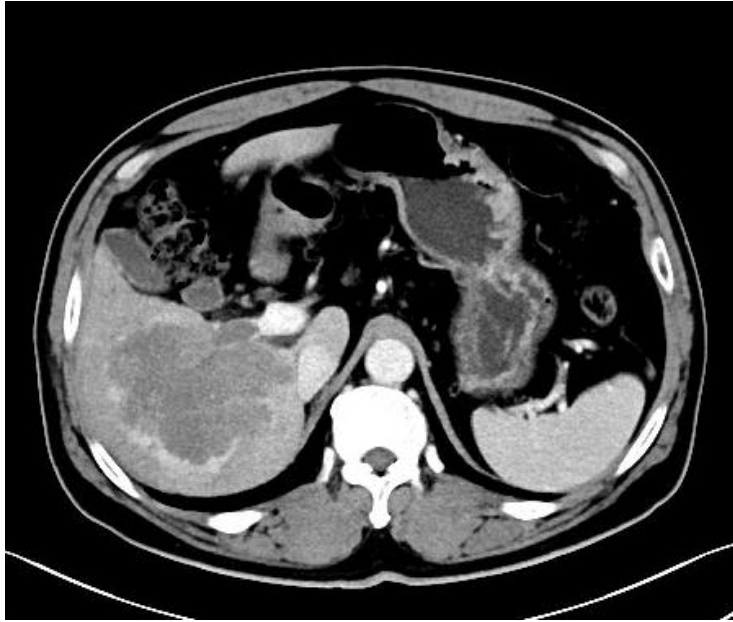

Before conversion

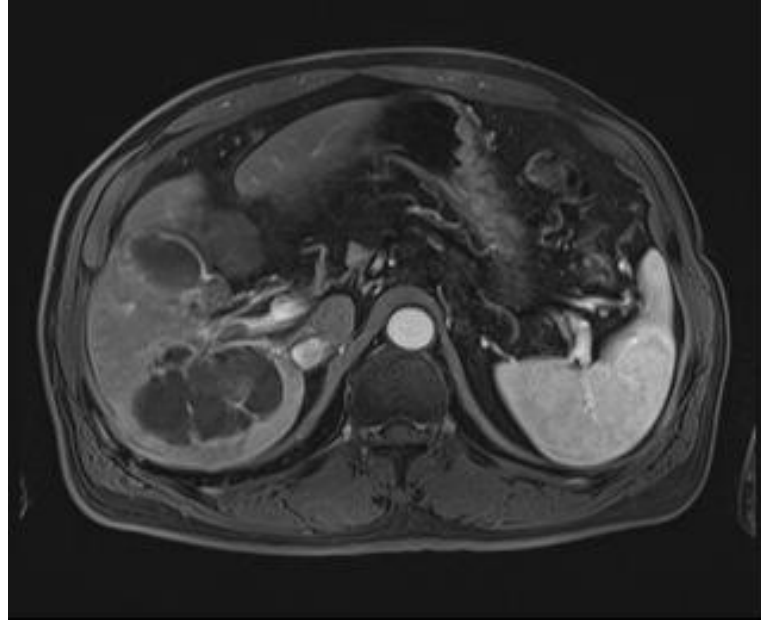

After conversion

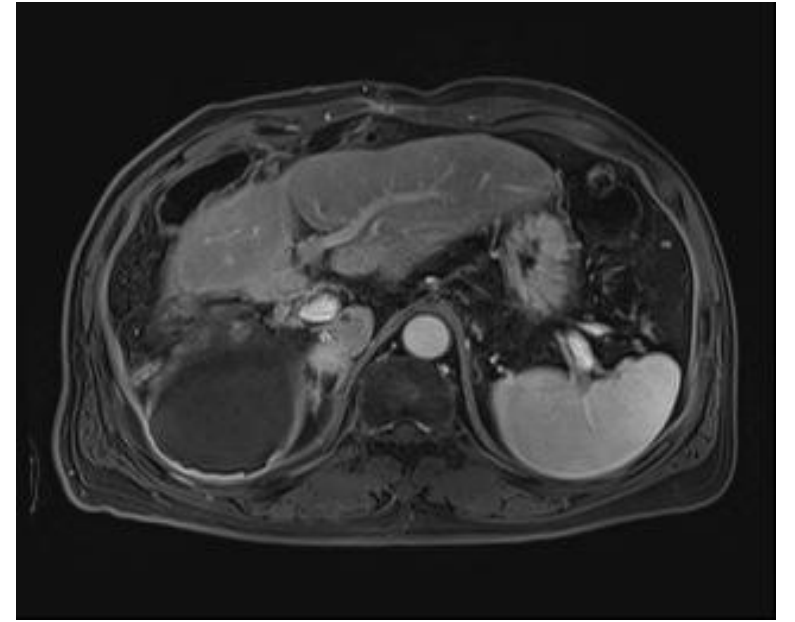

After surgery

**Patient 15**



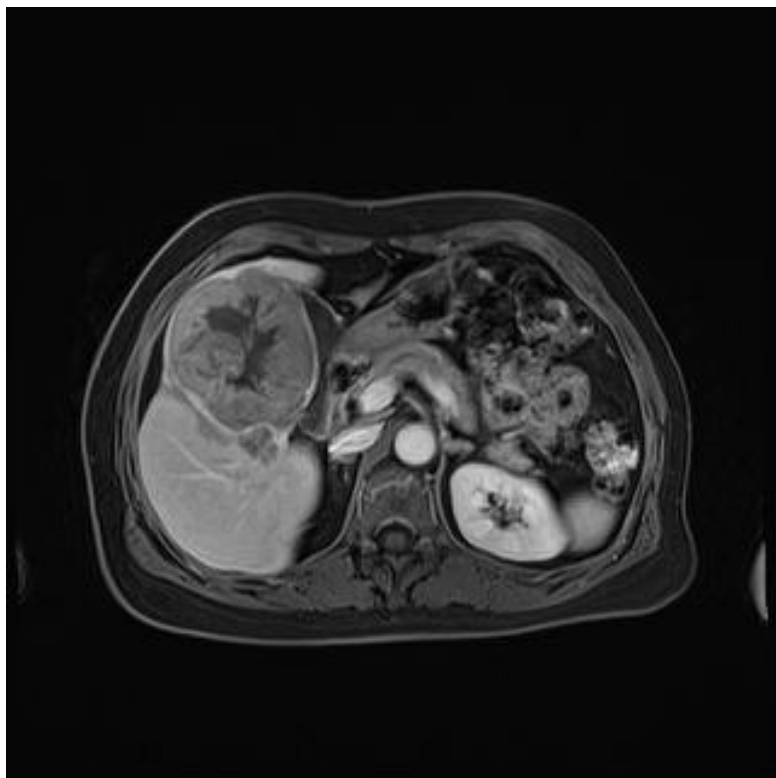

Before conversion

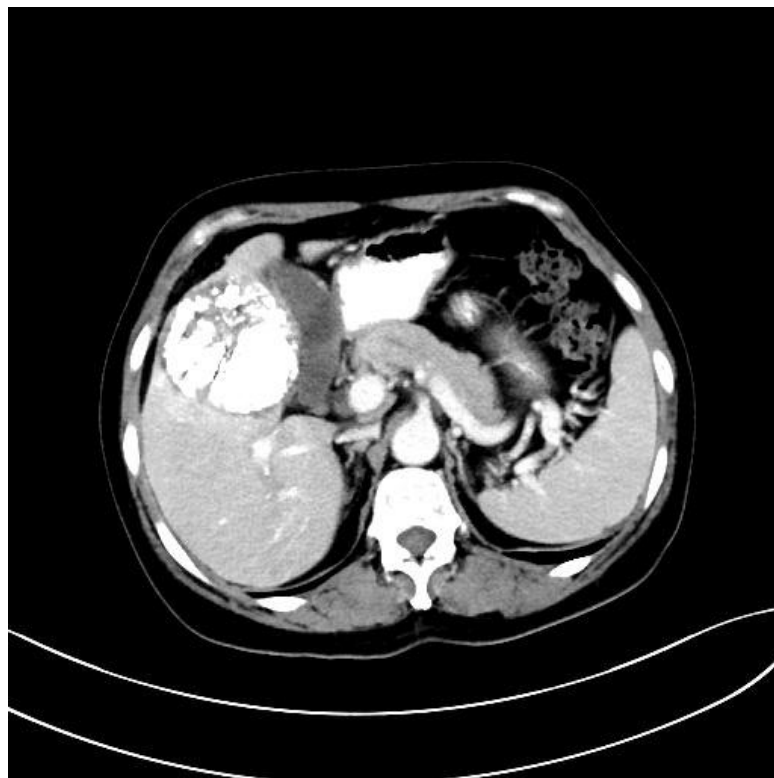

After conversion

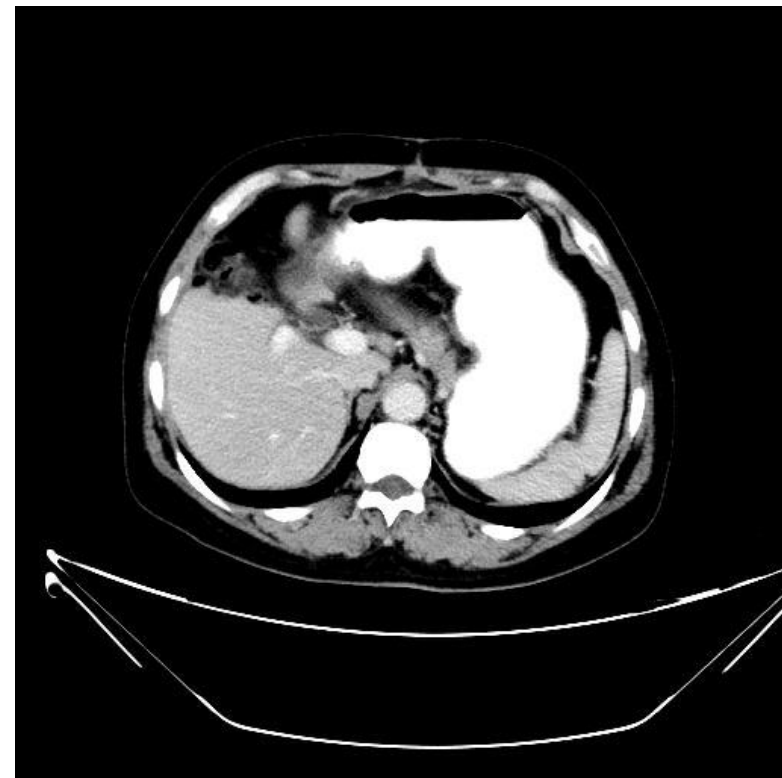

After surgery

**Patient 16**

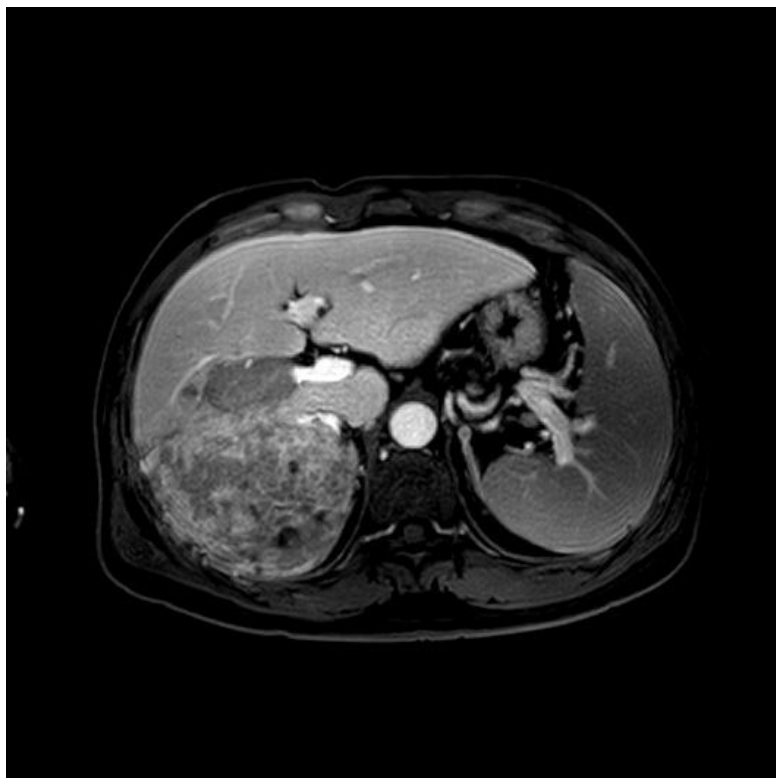

Before conversion

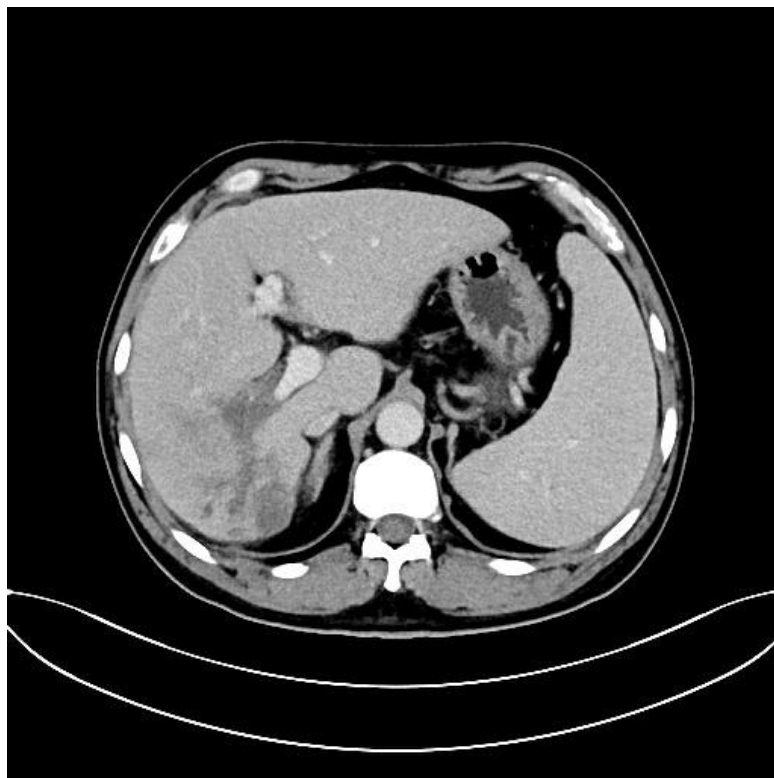

After conversion

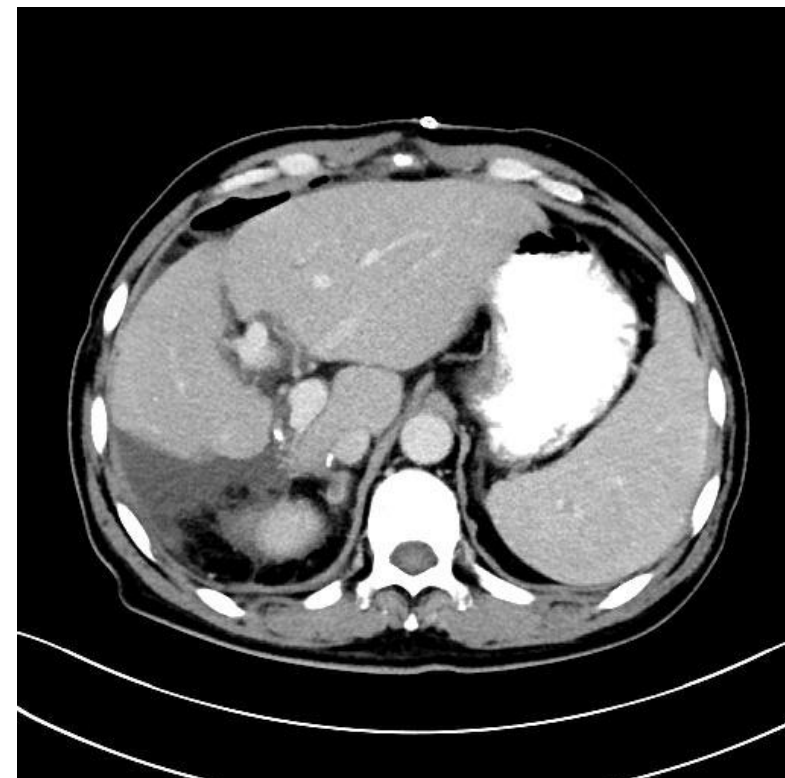

After surgery

**Patient 17**

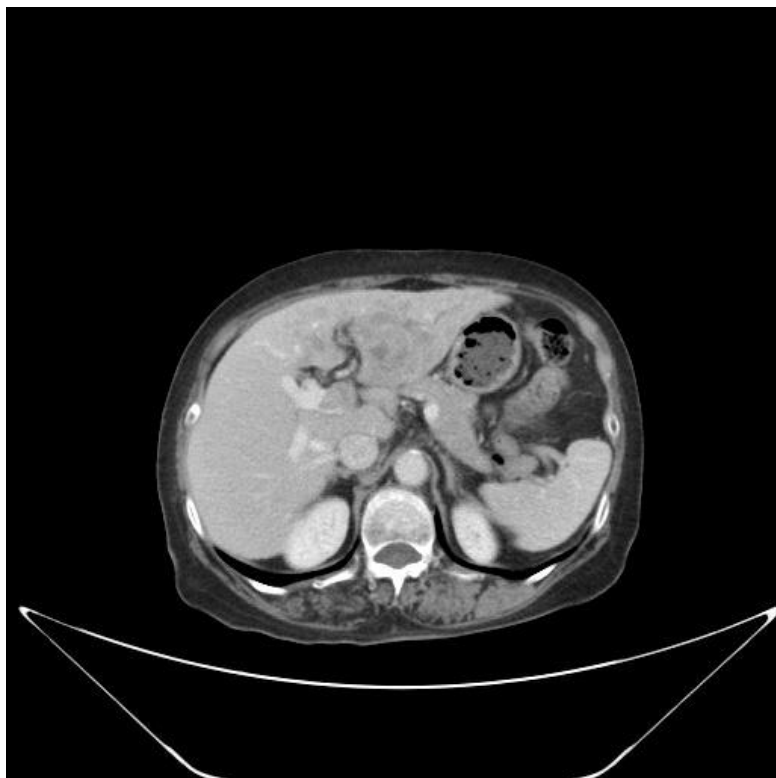

Before conversion

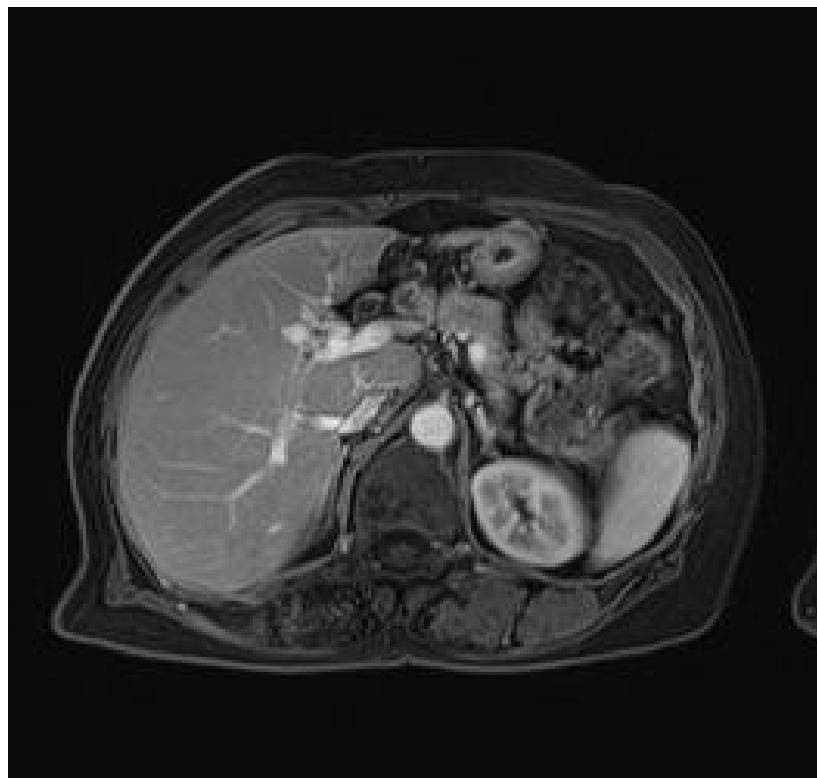

After conversion

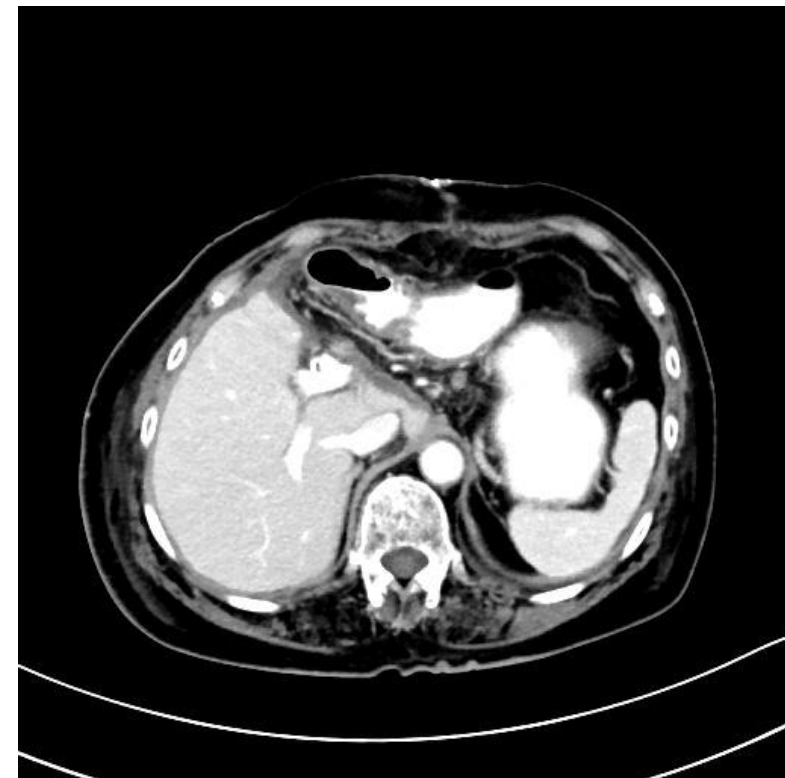

After surgery

**Patient 18**

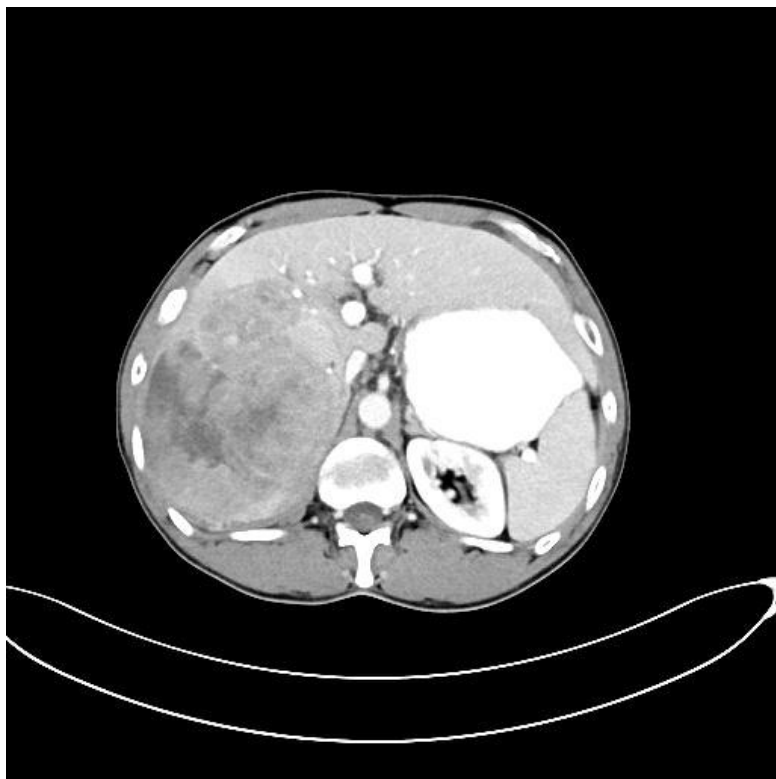

Before conversion

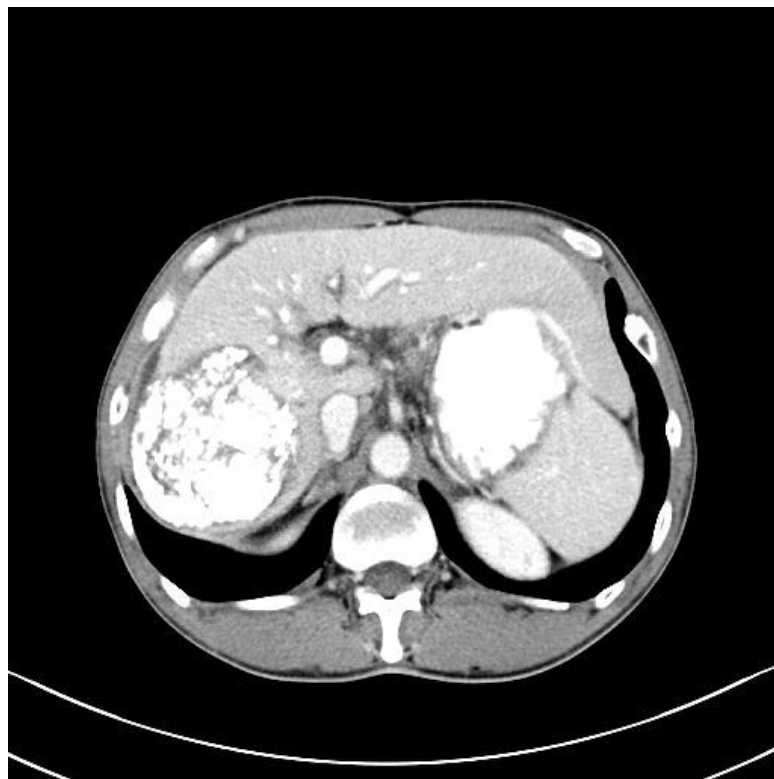

After conversion

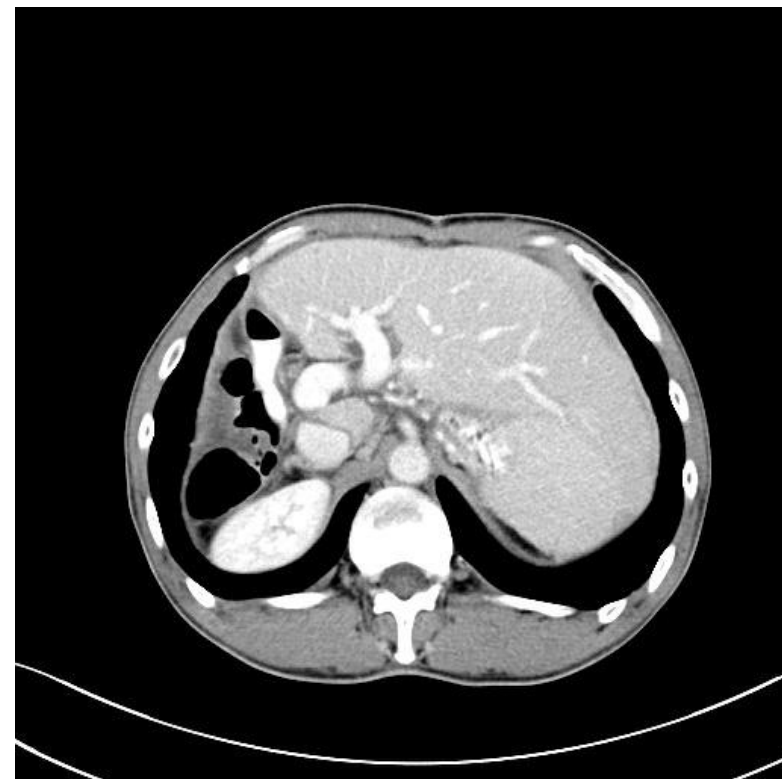

After surgery

**Patient 19**

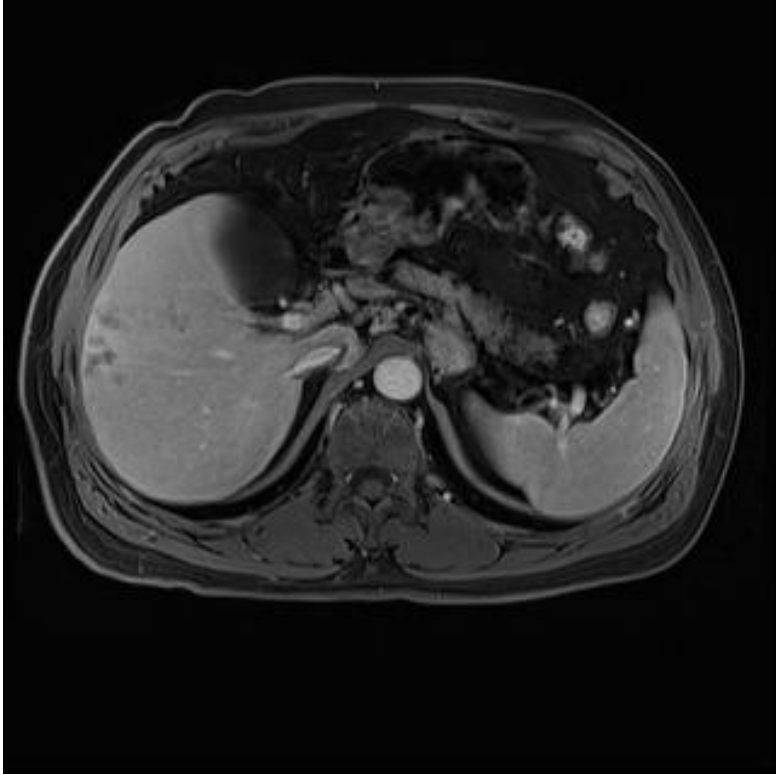

Before conversion

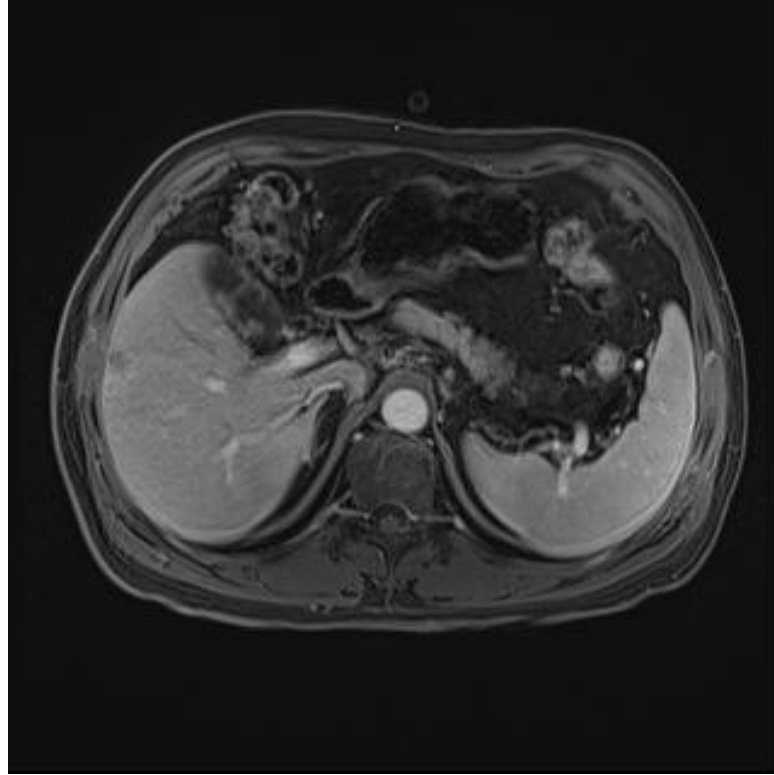

After conversion

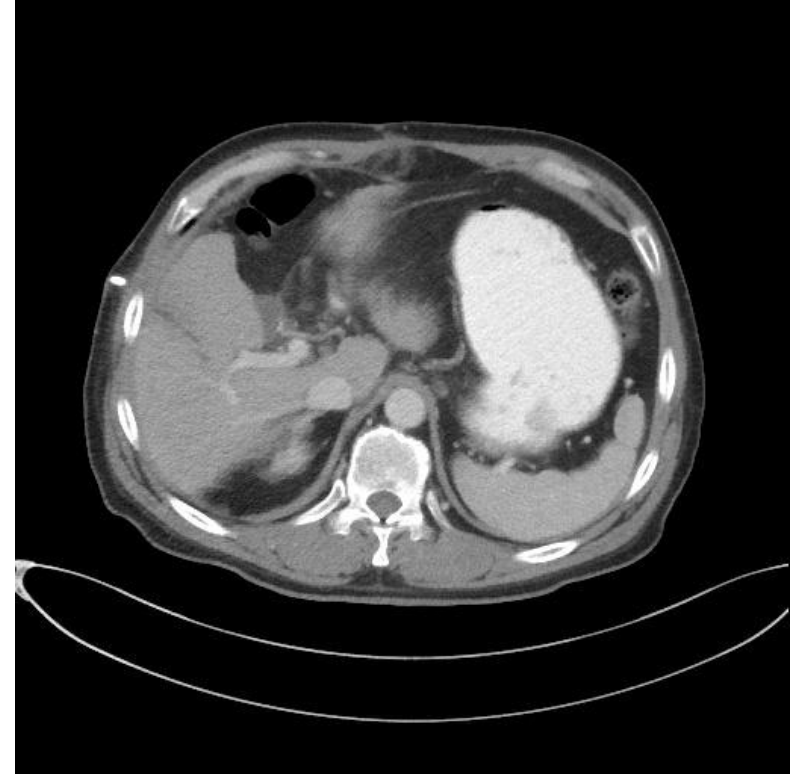

After surgery

**Patient 20**

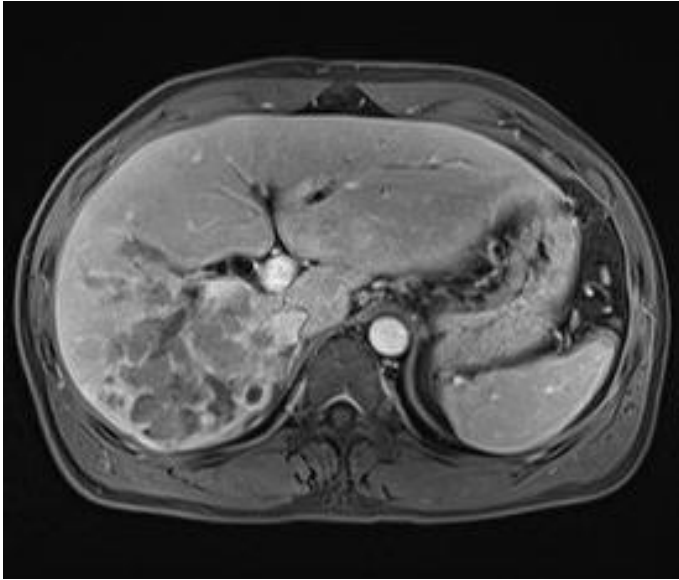

Before conversion

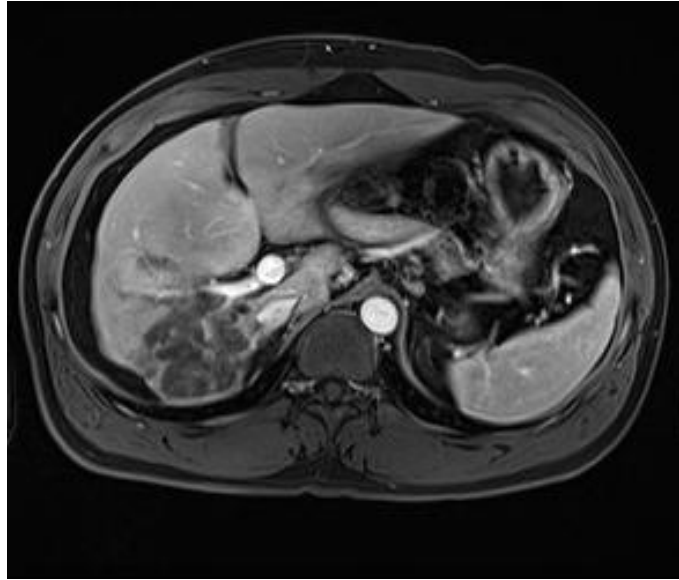

After conversion

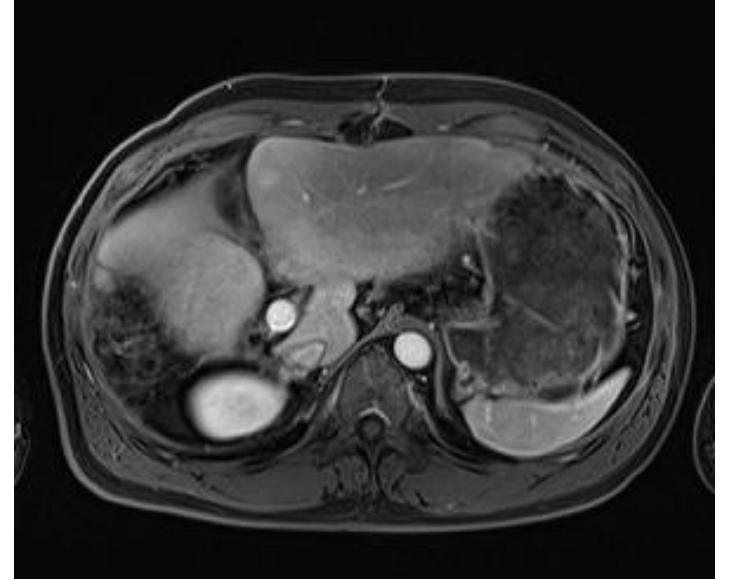

After surgery

**Patient 21**

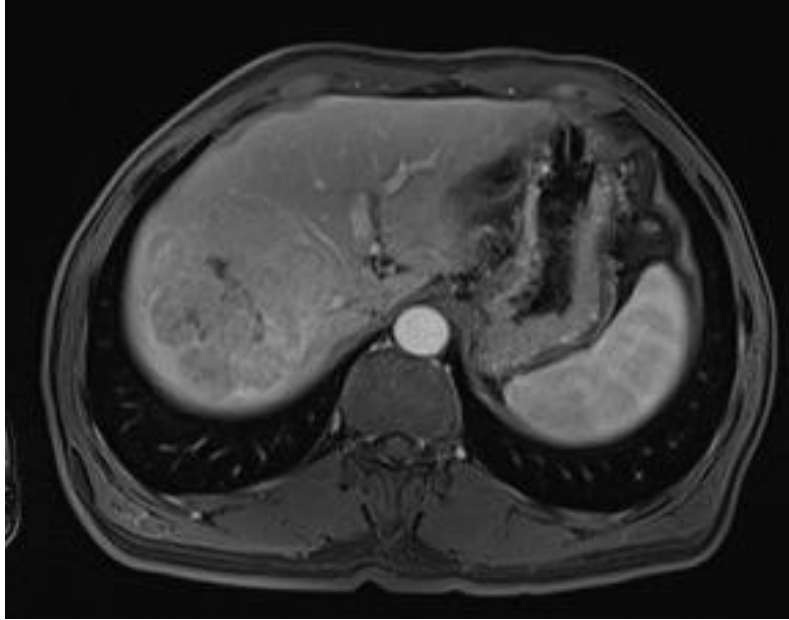

Before conversion

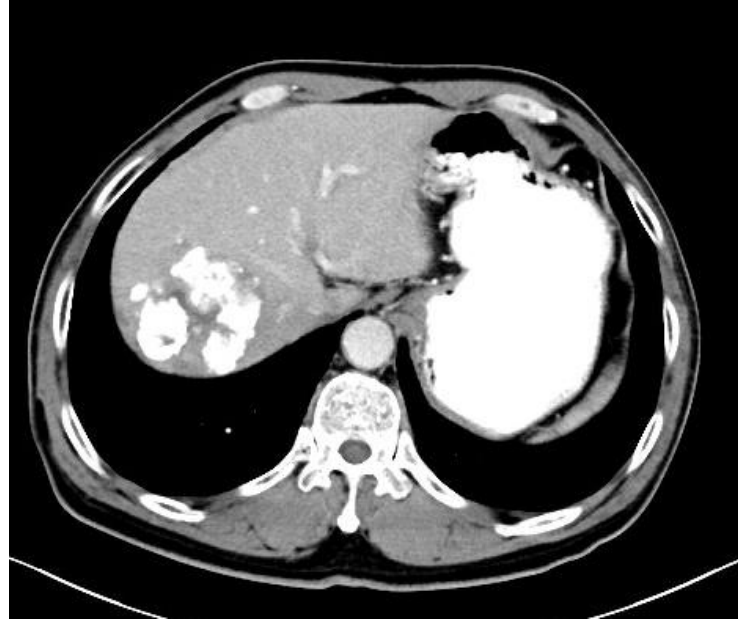

After conversion

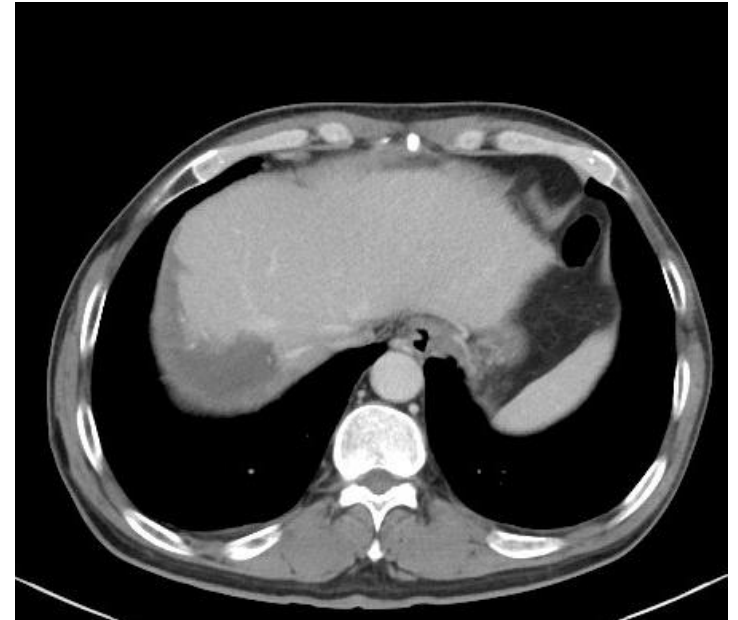

After surgery

**Patient 22**

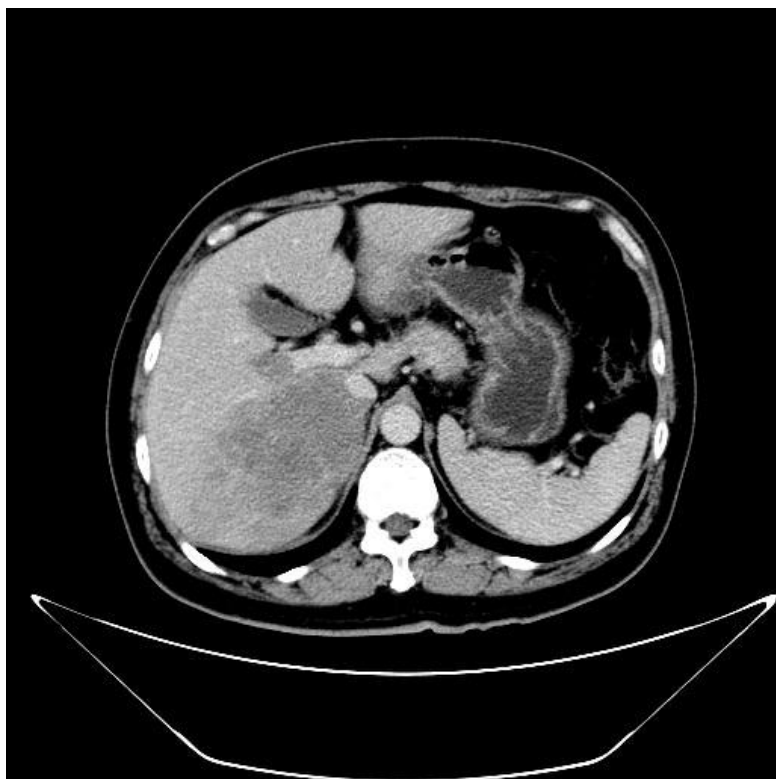

Before conversion

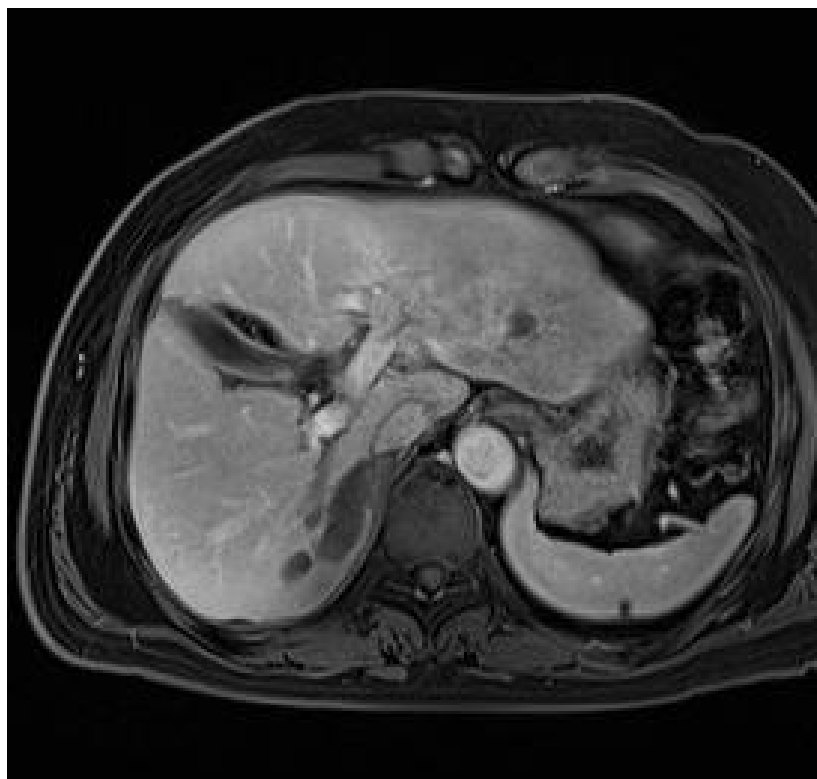

After conversion

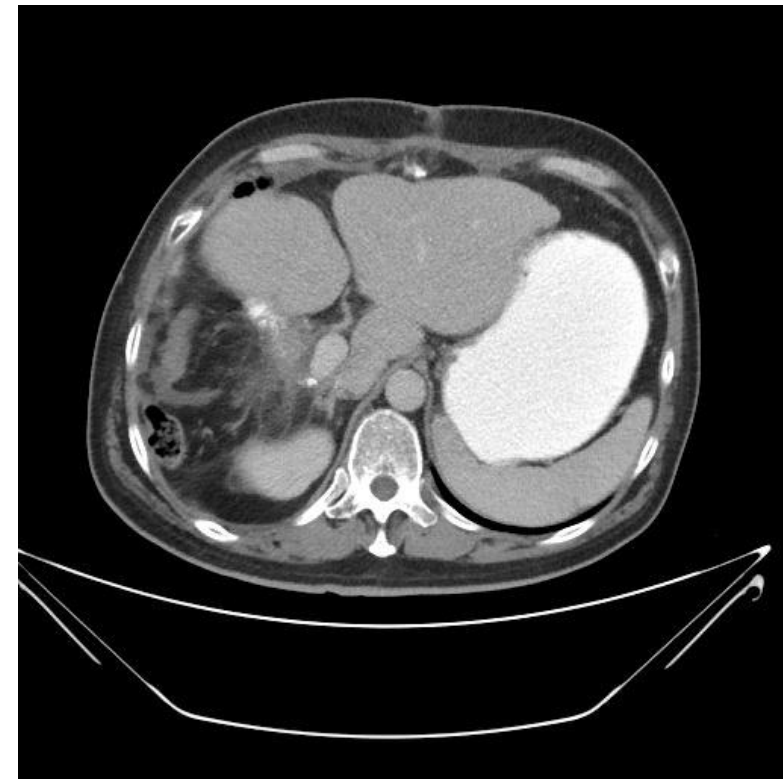

After surgery

**Patient 23**



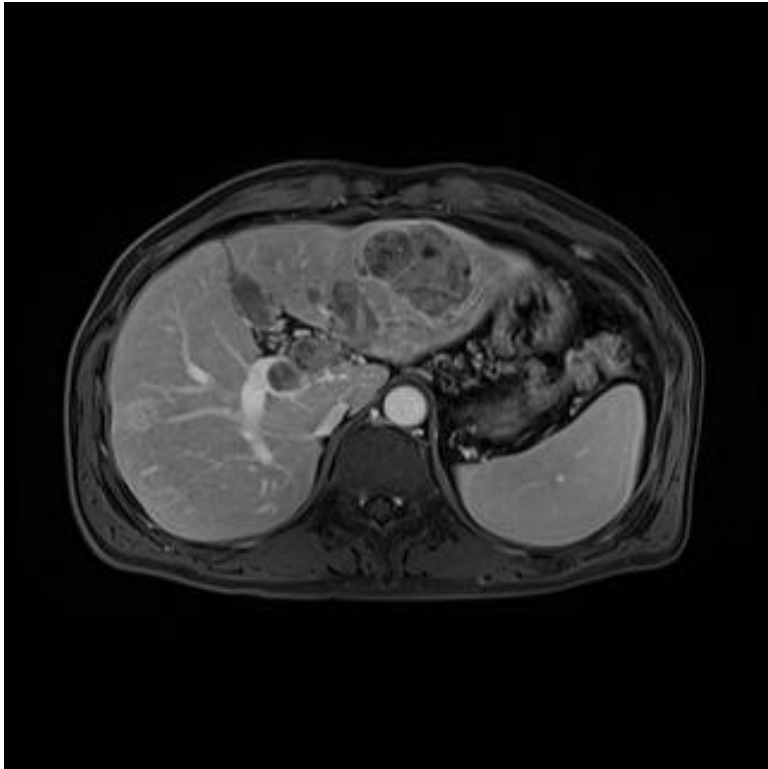

Before conversion

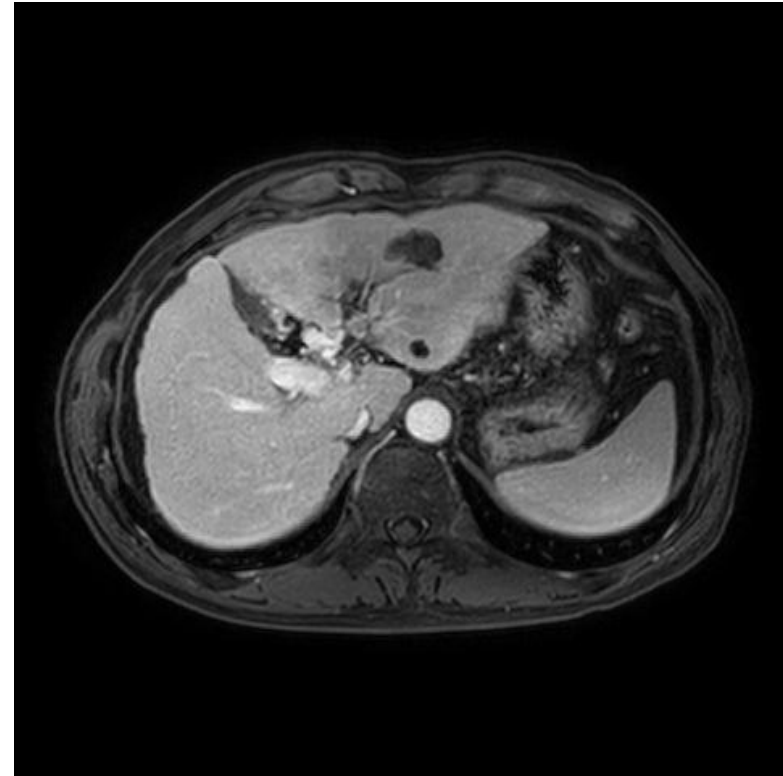

After conversion

**Patient 24**

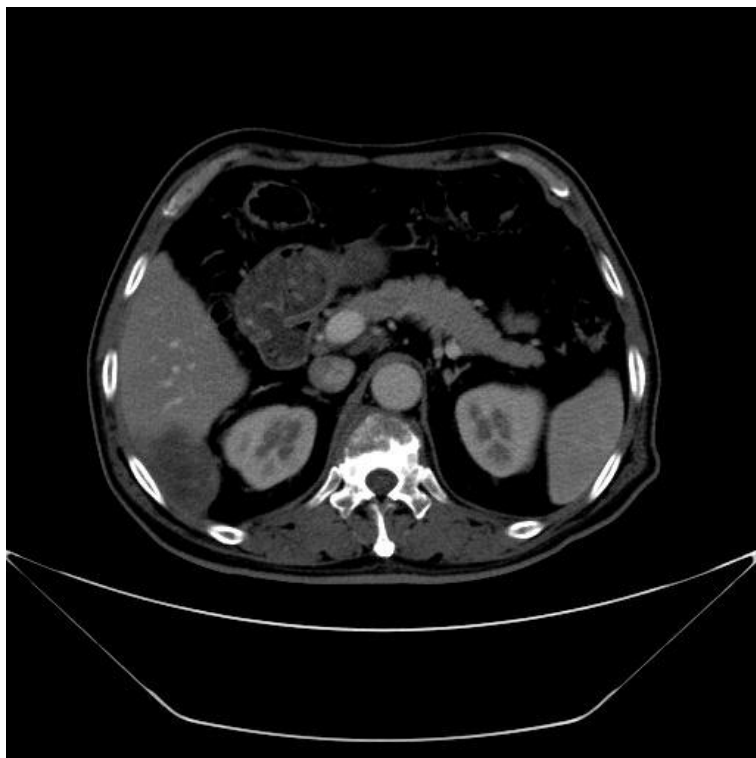

Before conversion

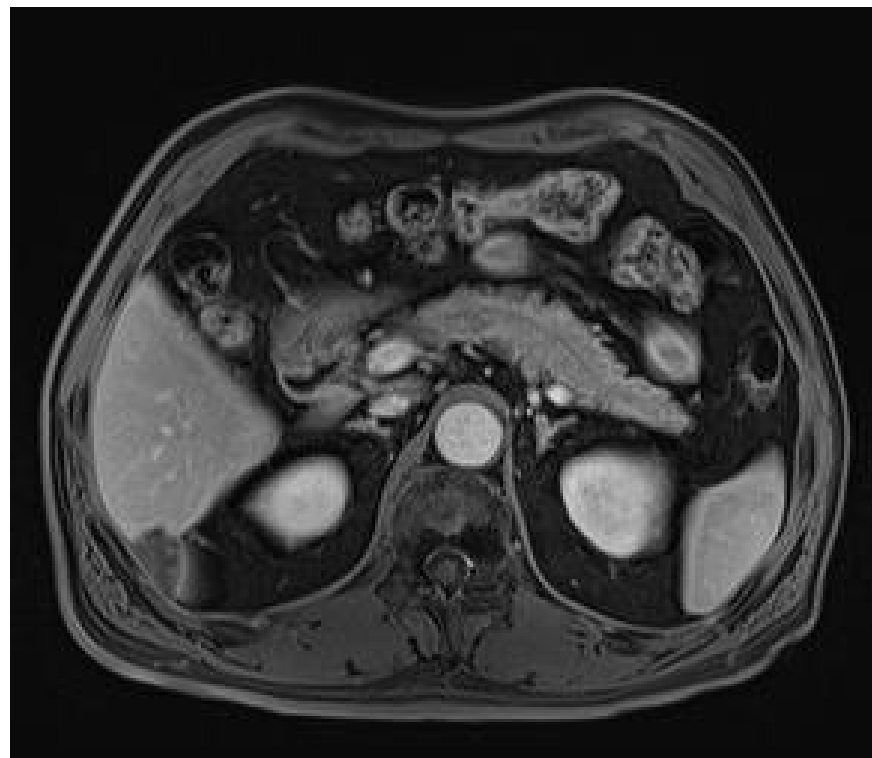

After conversion

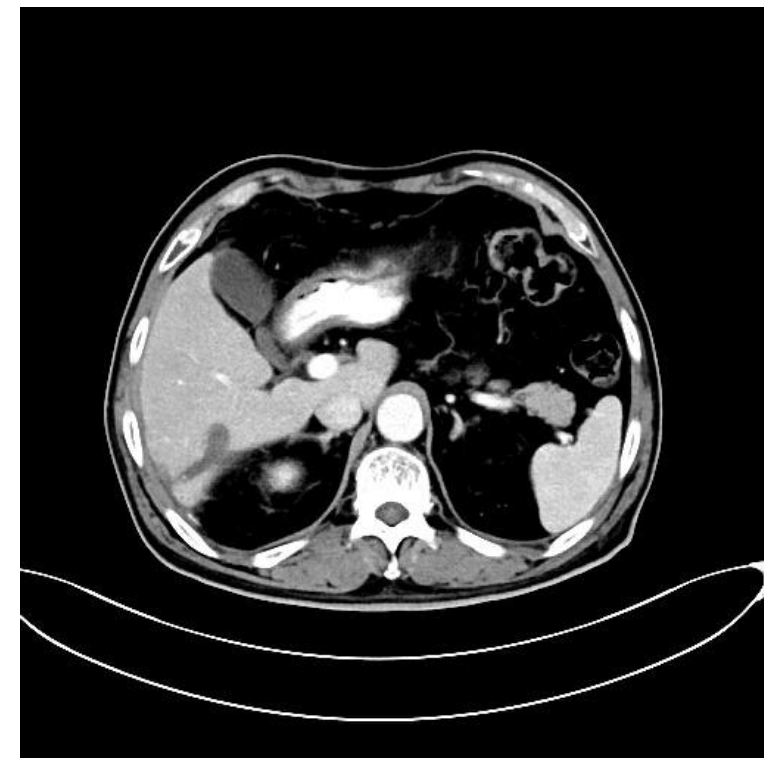

After surgery

**Patient 25**

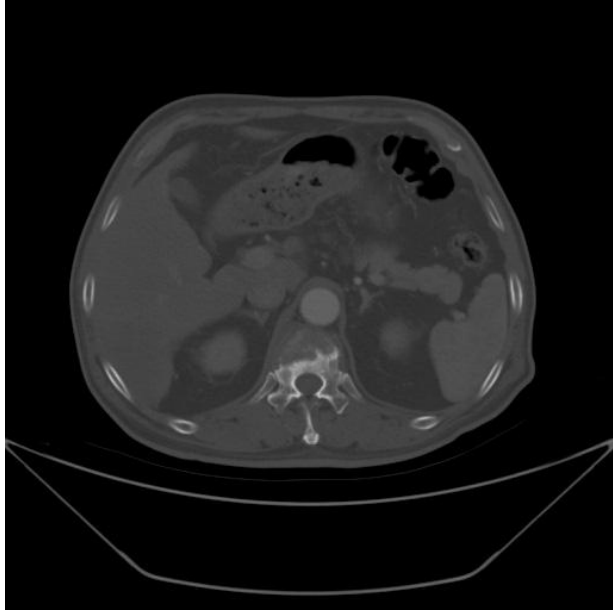

Before conversion

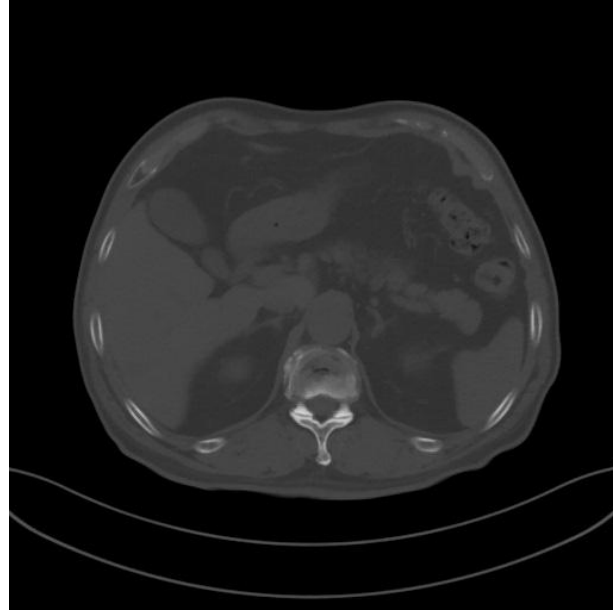

After conversion

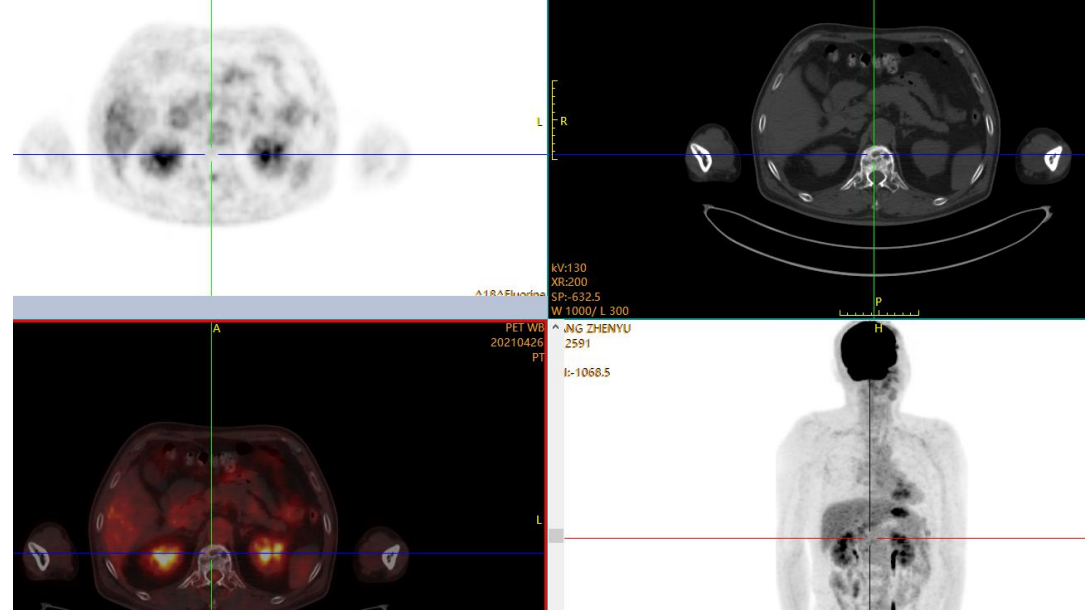

After surgery

**Patient 25**

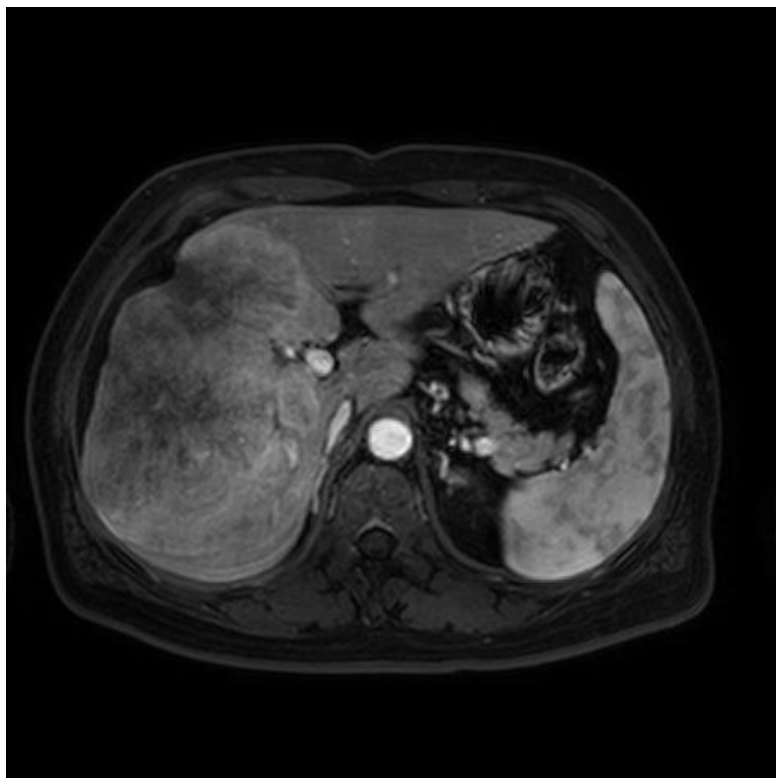

Before conversion

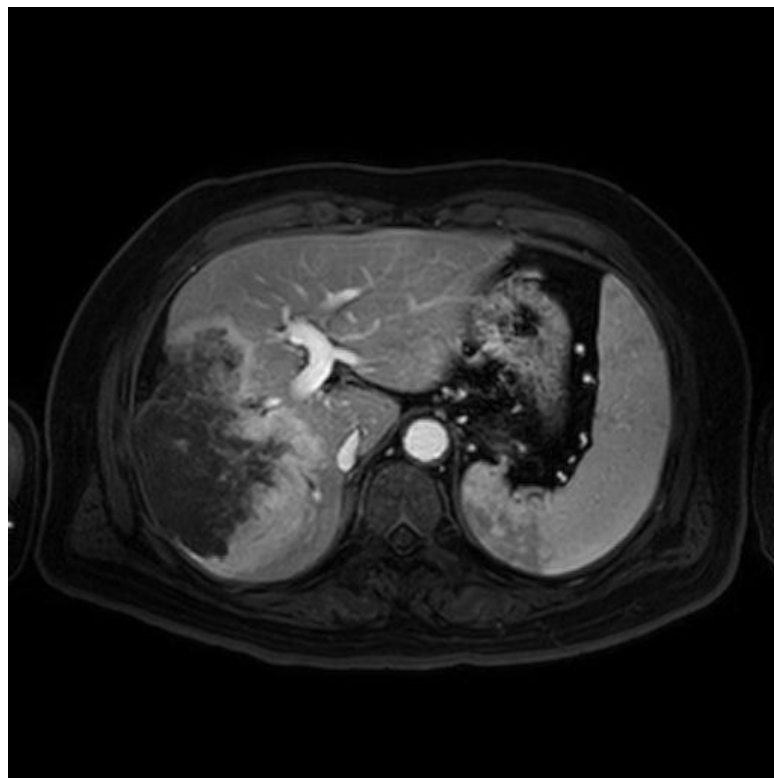

After conversion

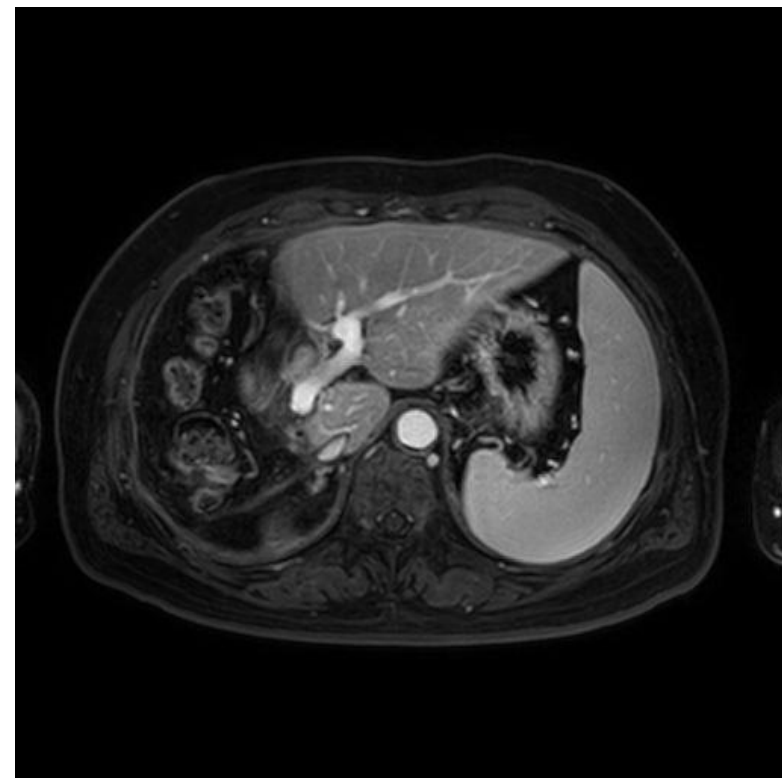

After surgery

**Patient 26**
